# Supplementary material
Source: PubMed Central journal article supplement (PMC2655204)
Supplement: NIHMS69408-supplement.pdf [file NIHMS69408-supplement.pdf]

# Brevisamide: An unprecedented monocyclic ether alkaloid from the dinoflagellate *Karenia brevis* that provides a potential model for ladder-frame initiation— Supporting Information

Masayuki Satake,<sup>†</sup> Andrea J. Bourdelais, Ryan M. Van Wagoner, Daniel G. Baden, and Jeffrey L. C. Wright\*

Center for Marine Science  
University of North Carolina at Wilmington  
5600 Marvin K Moss Lane, Wilmington, NC 28409

---

<sup>†</sup>Current address: Department of Chemistry, Graduate School of Science, The University of Tokyo, Hongo, Bunkyo-ku, Tokyo 113-0033, Japan

\*To whom correspondence should be addressed. Tel: 910-962-2397, E-mail: wrightj@uncw.edu

## **Instrumentation used**

NMR spectra were acquired on a Bruker Avance 500 MHz spectrometer. Low-resolution mass spectra were acquired on a Waters ZQ instrument using electrospray ionization and interfaced to an Agilent 1100 HPLC system. High-resolution mass spectra were acquired on a Waters QToF Ultima spectrometer using electrospray ionization. UV-vis spectra were acquired on a Beckman DU640B Spectrophotometer. Infrared spectra were acquired on a Nicolet 6700 FT-IR (Thermo Scientific, Inc.) using OMNIC acquisition software. Optical rotation measurements were made on an Autopol III polarimeter (Rudolph Research Analytical) at ambient temperature.

# NMR spectra of brevisamide

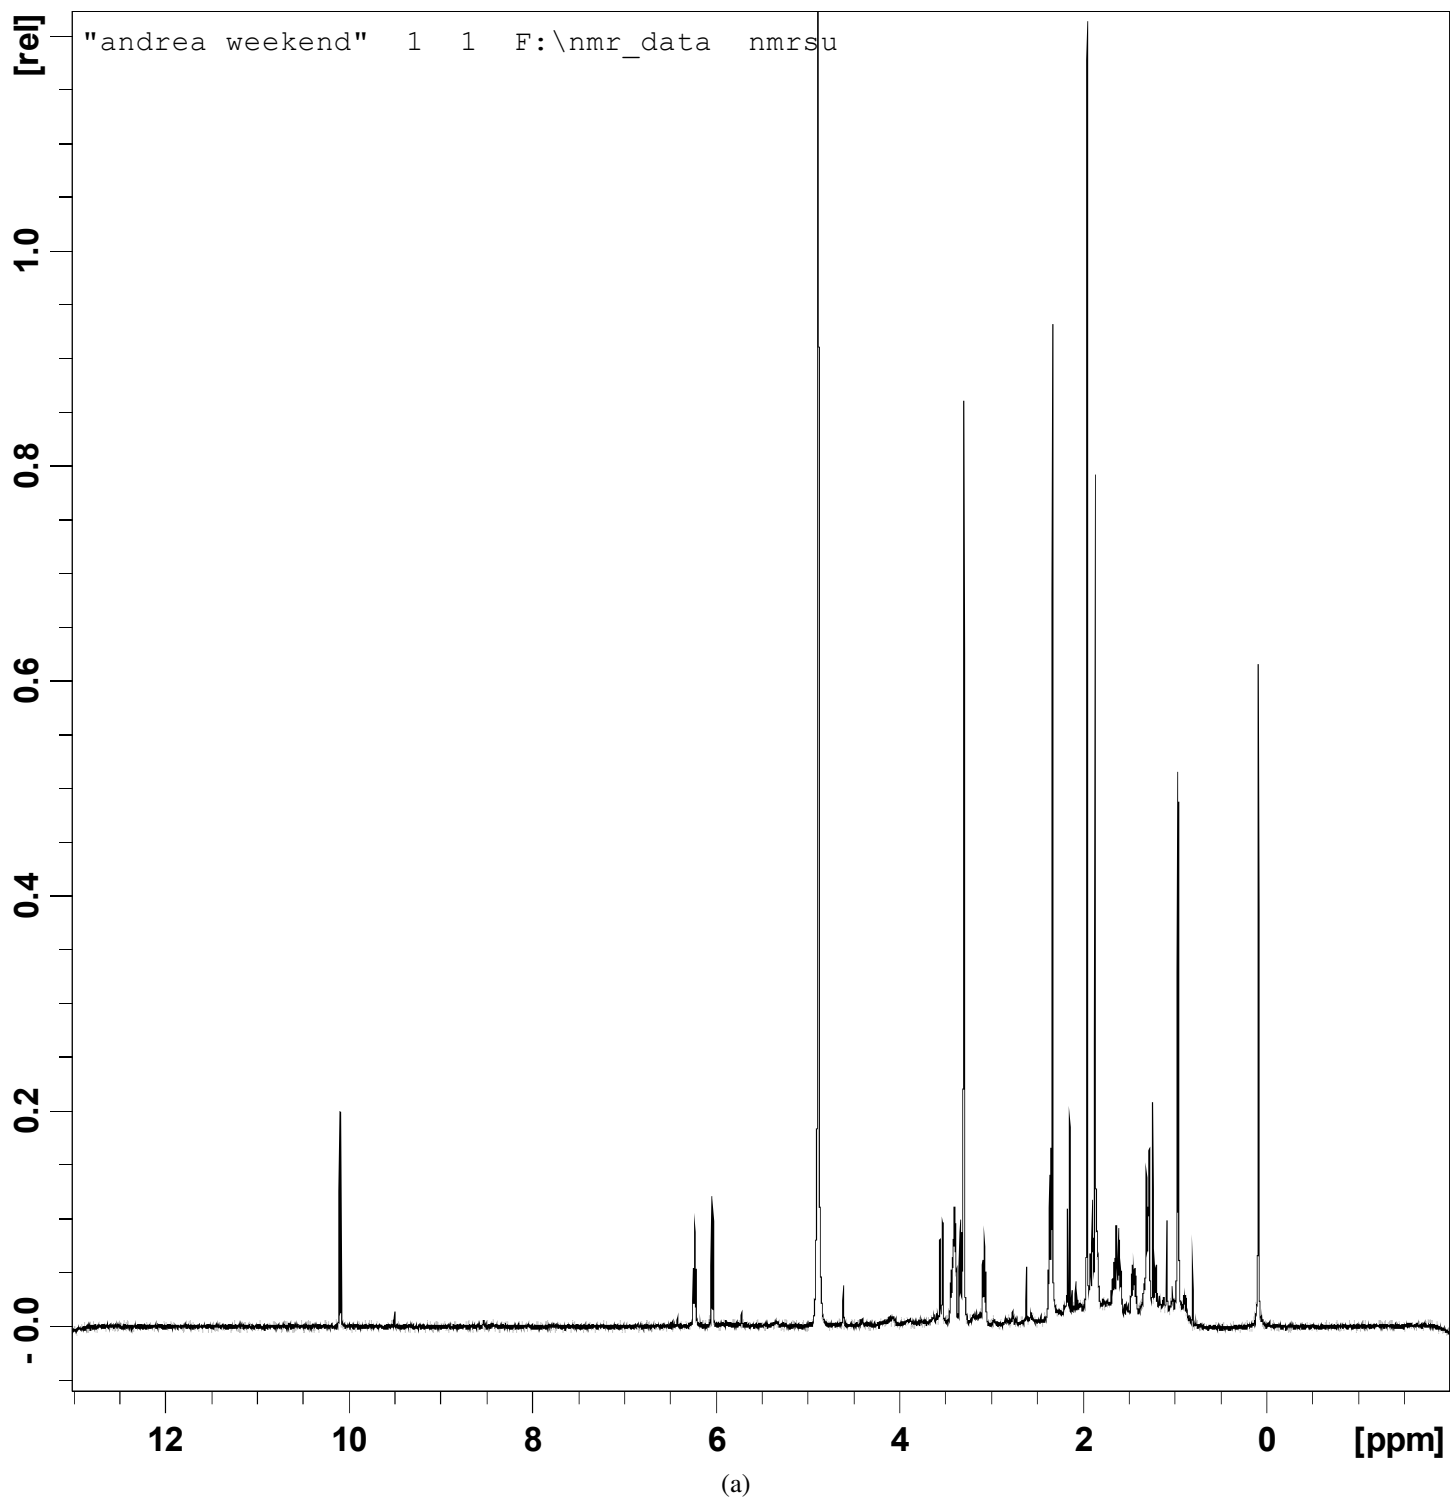

Figure S1.  $^1\text{H}$  NMR spectrum of brevisamide (1). a- Full spectrum. b-f- Details from various regions.

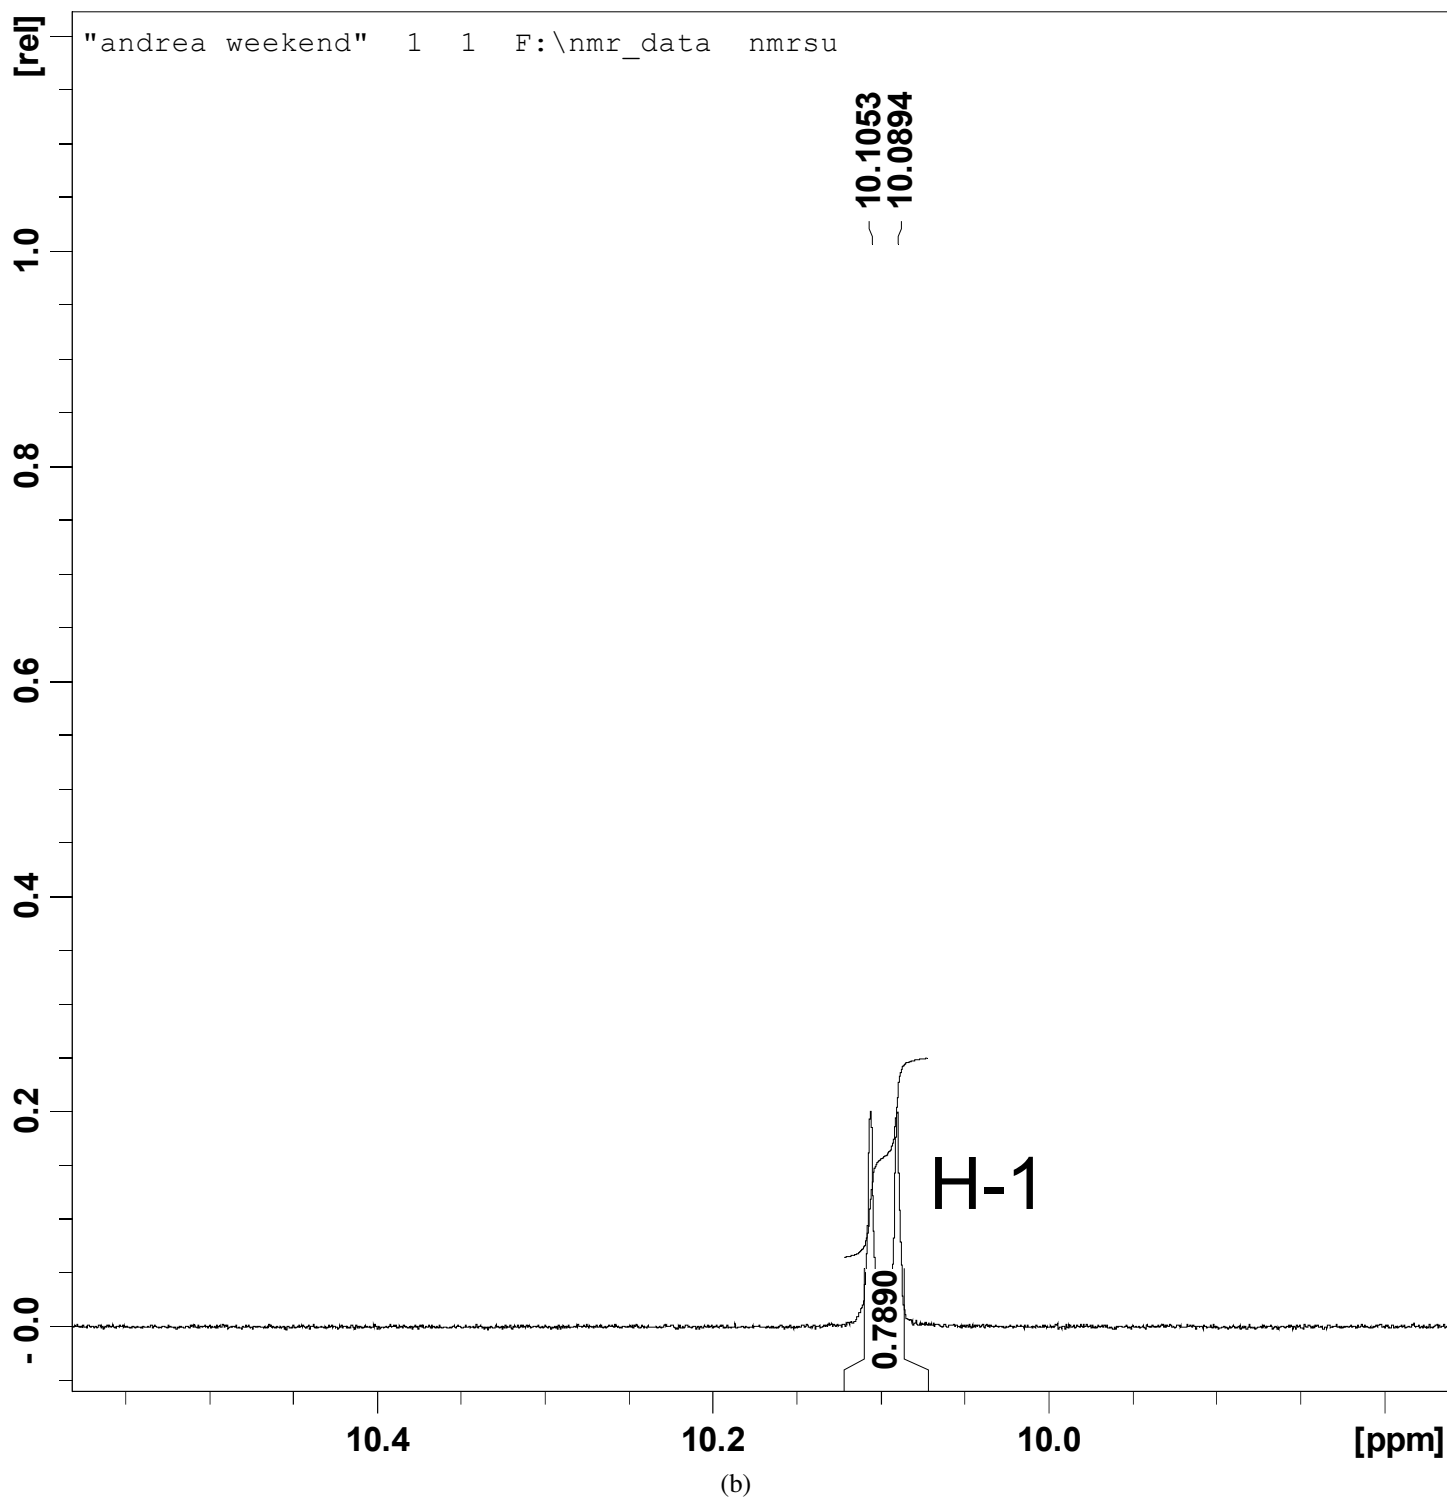

Figure S1 continued.

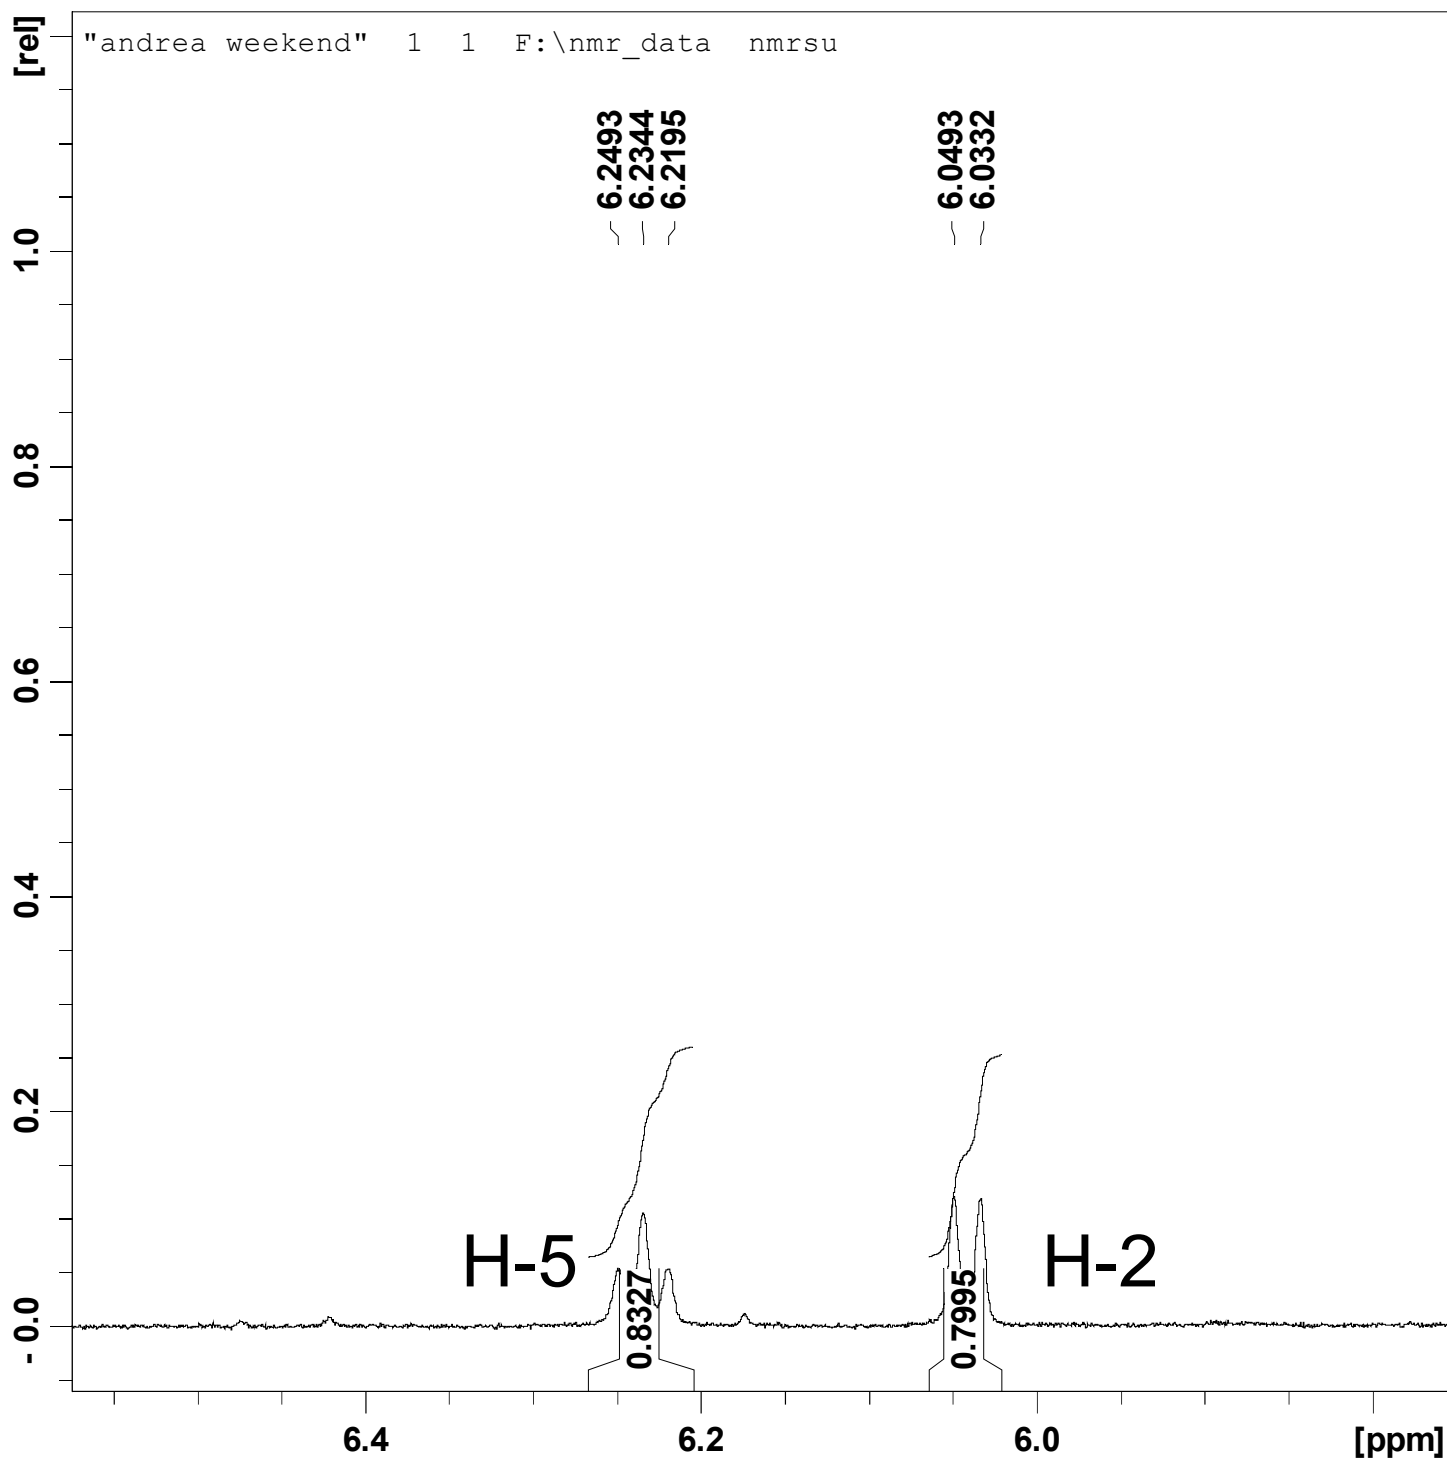

(c)

Figure S1 continued.

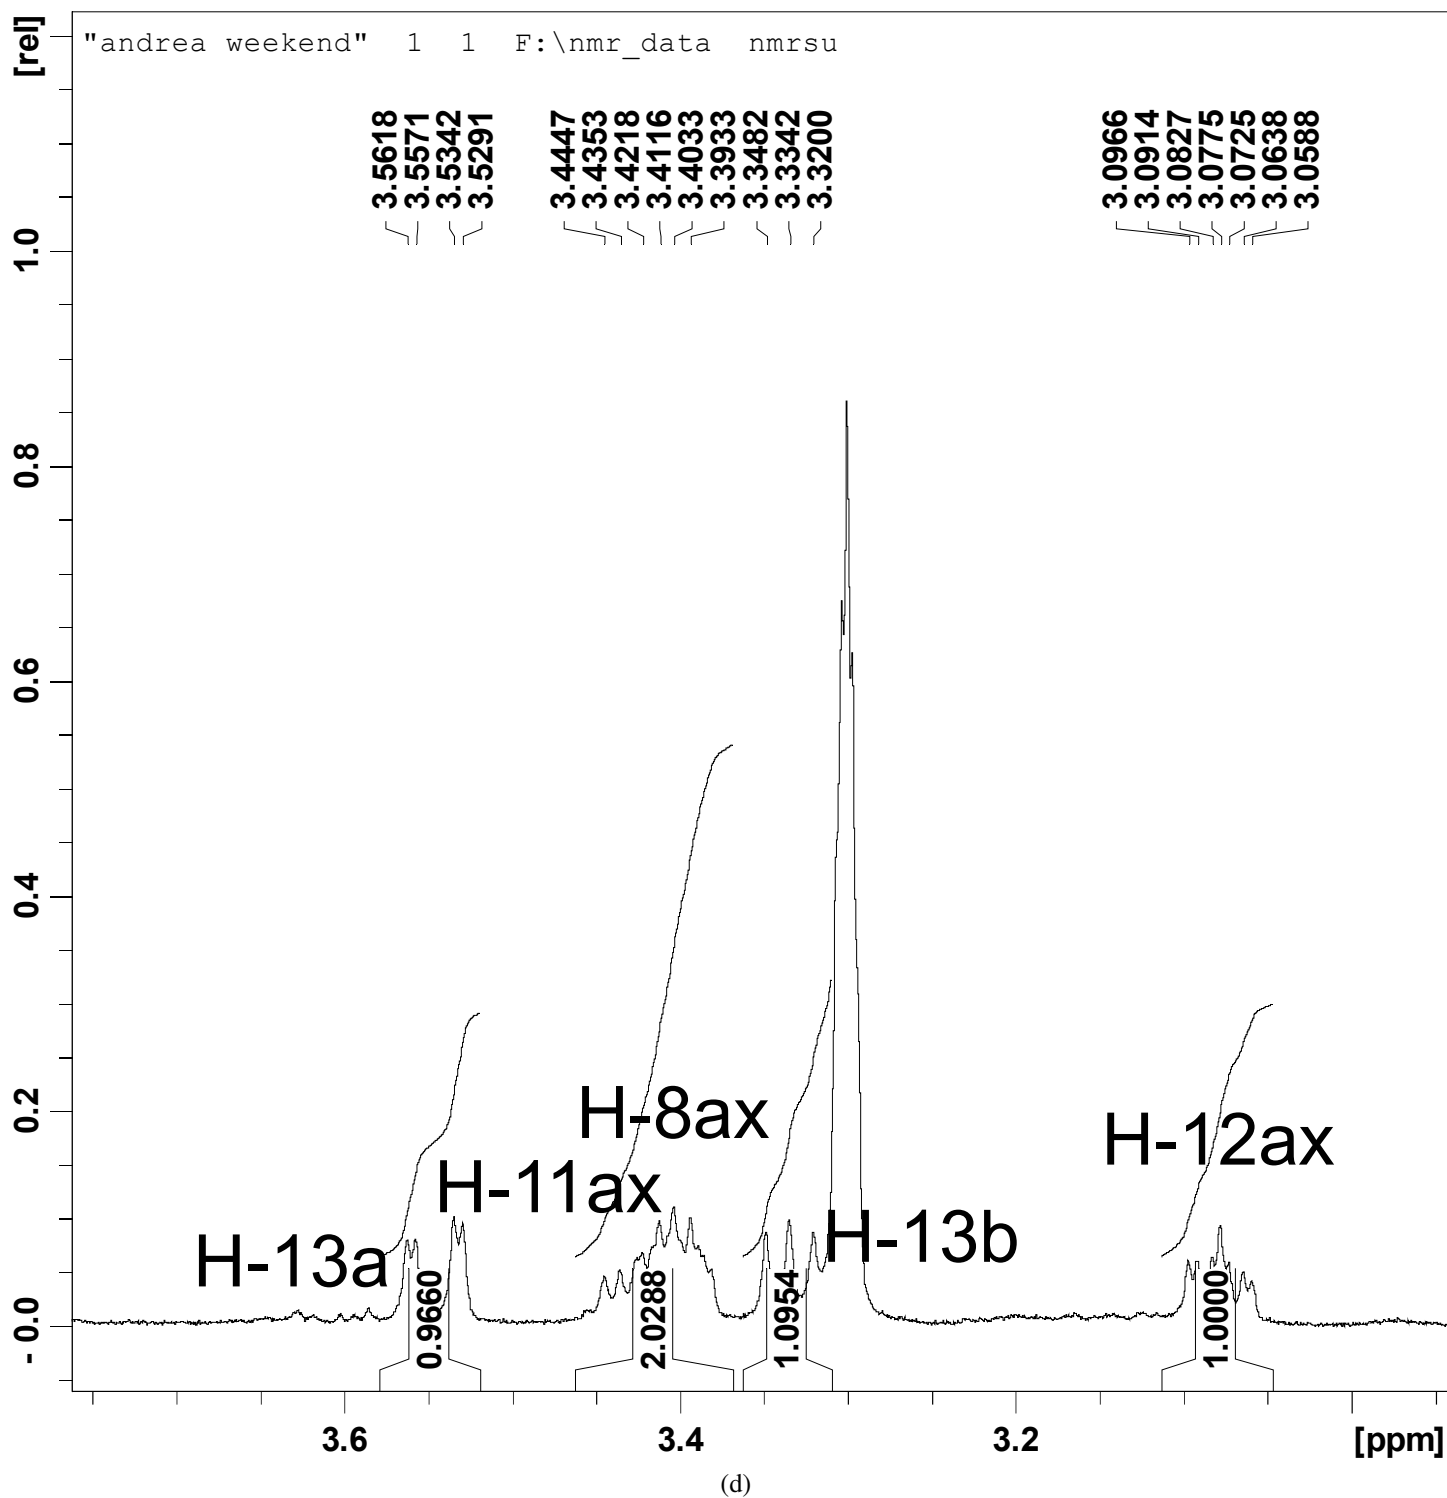

Figure S1 continued.

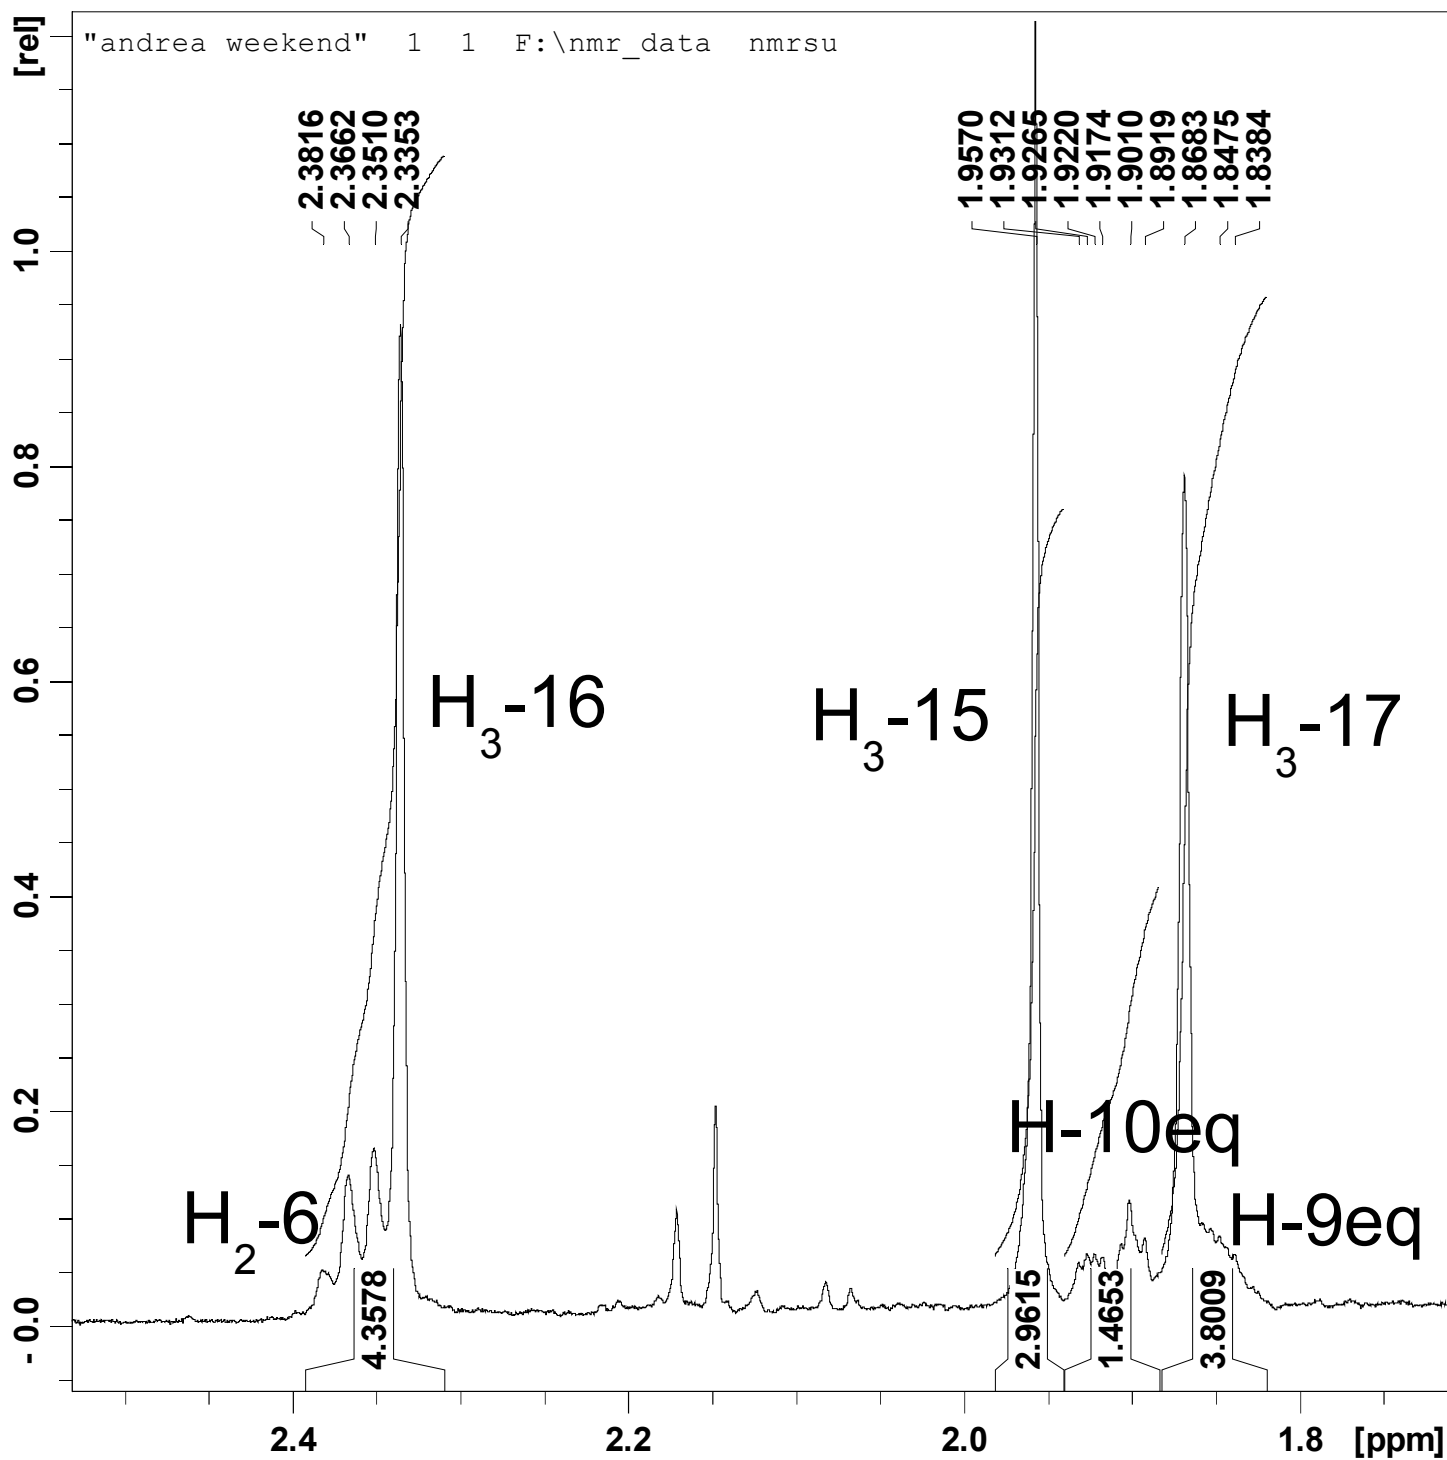

(e)

Figure S1 continued.

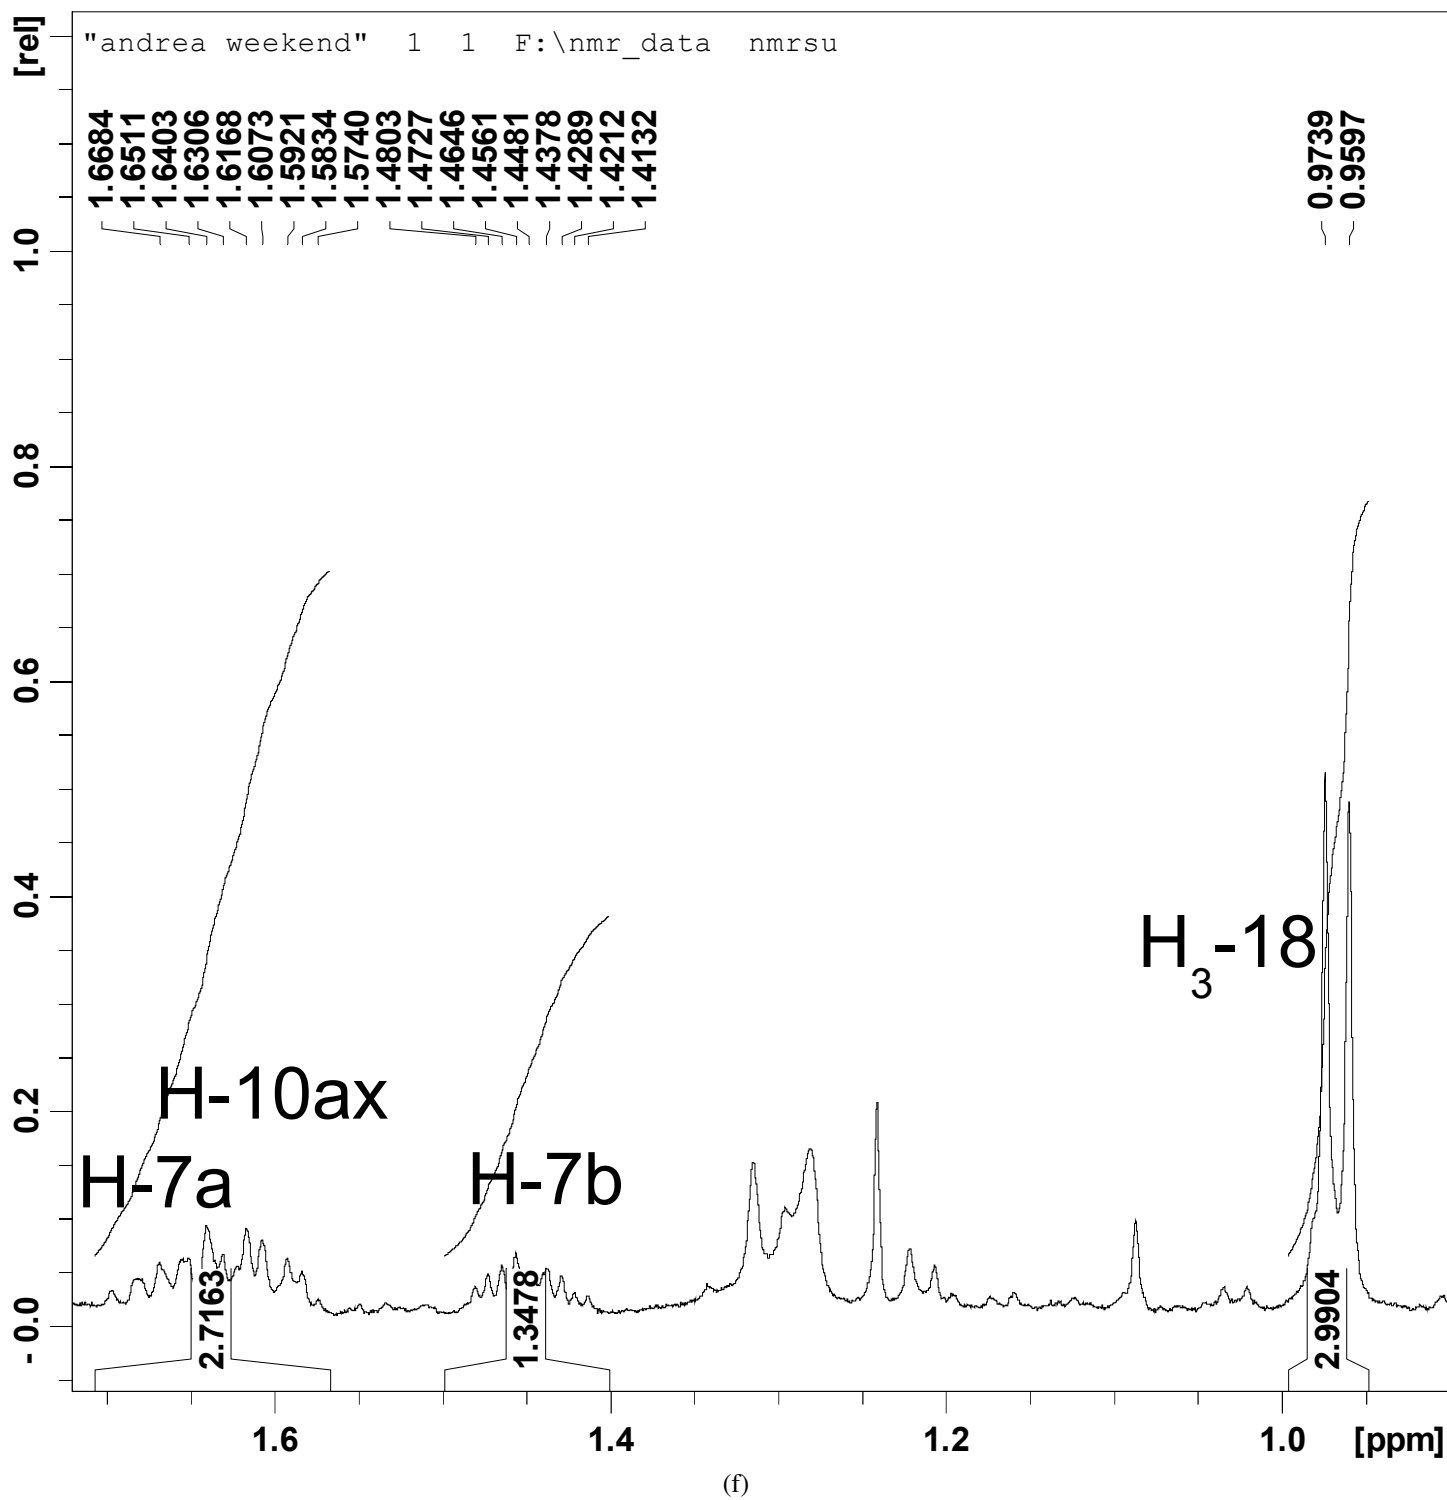

Figure S1 continued.



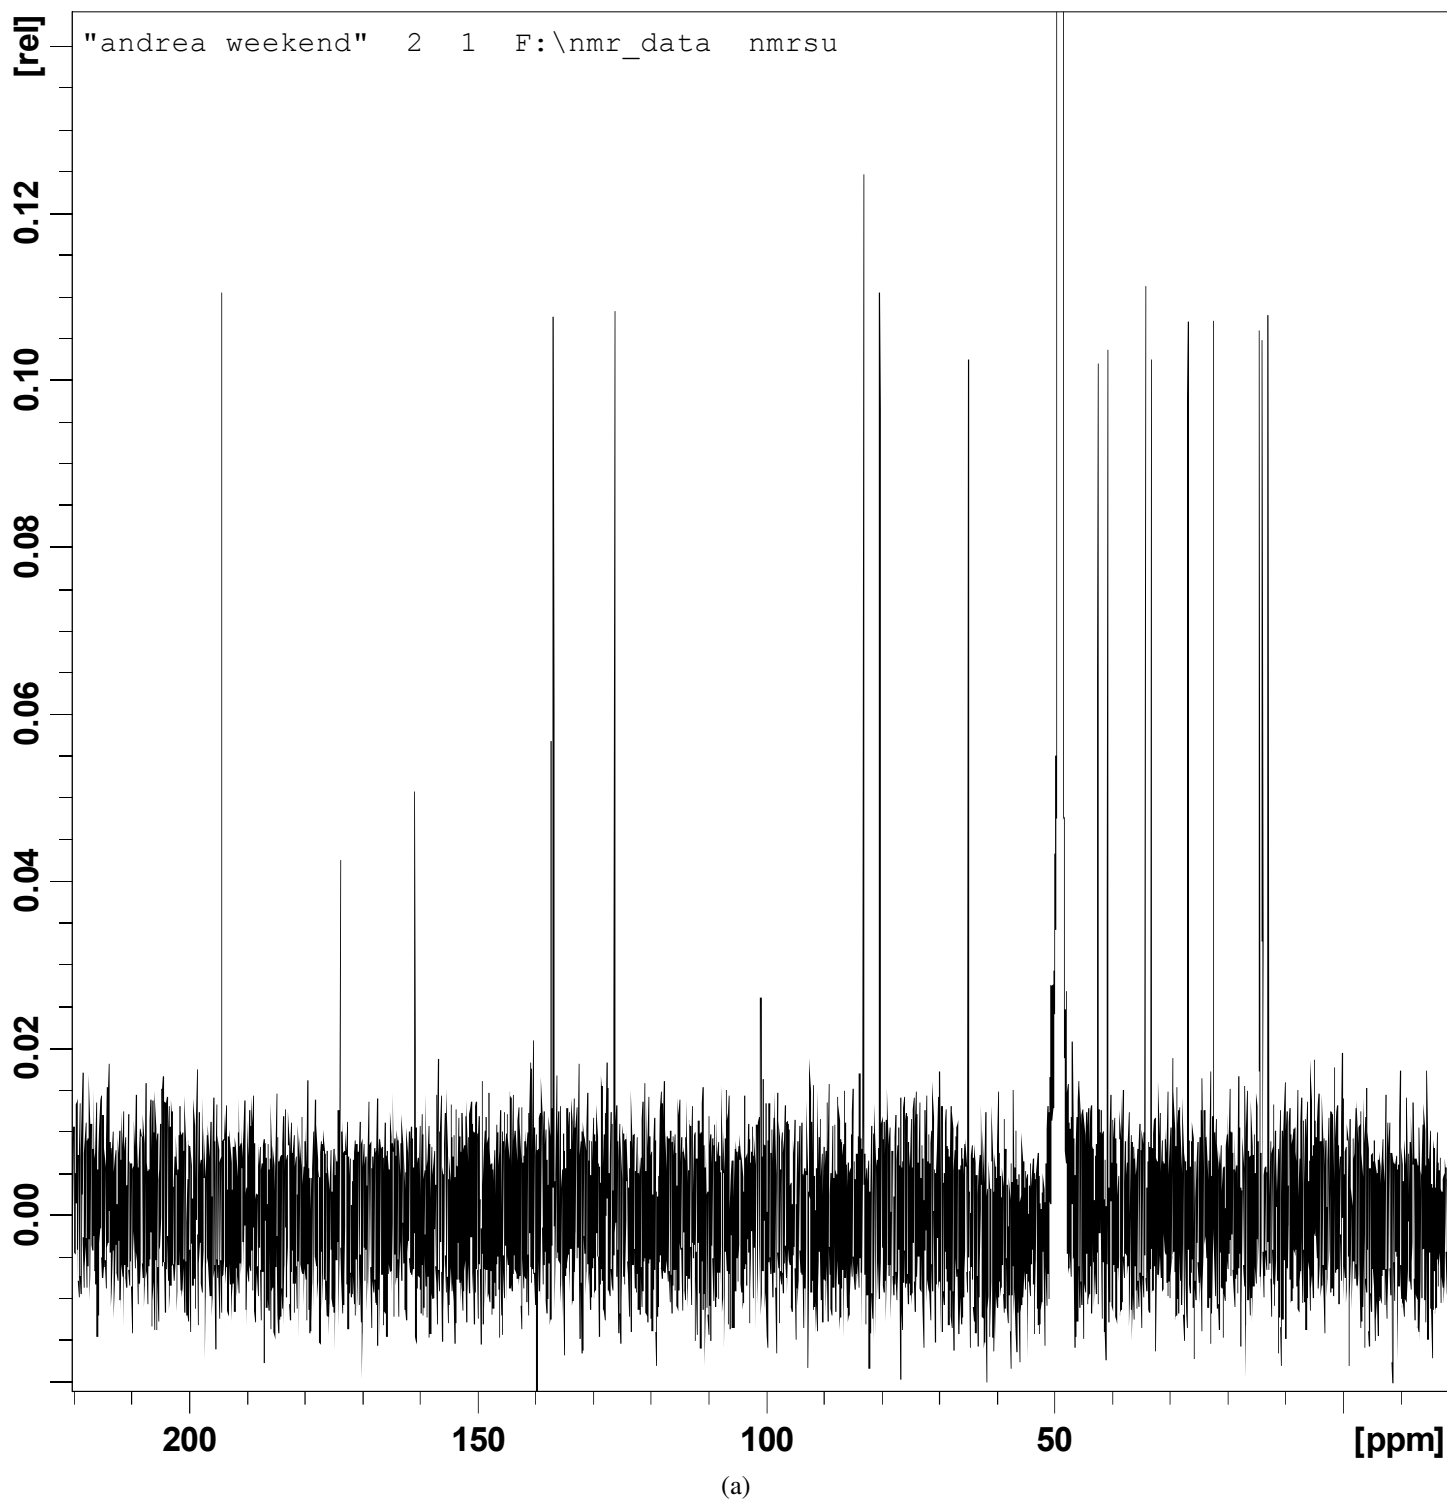

Figure S2. <sup>13</sup>C NMR spectrum of brevisamide (**1**). a- Full spectrum. b-g- Details from various regions.

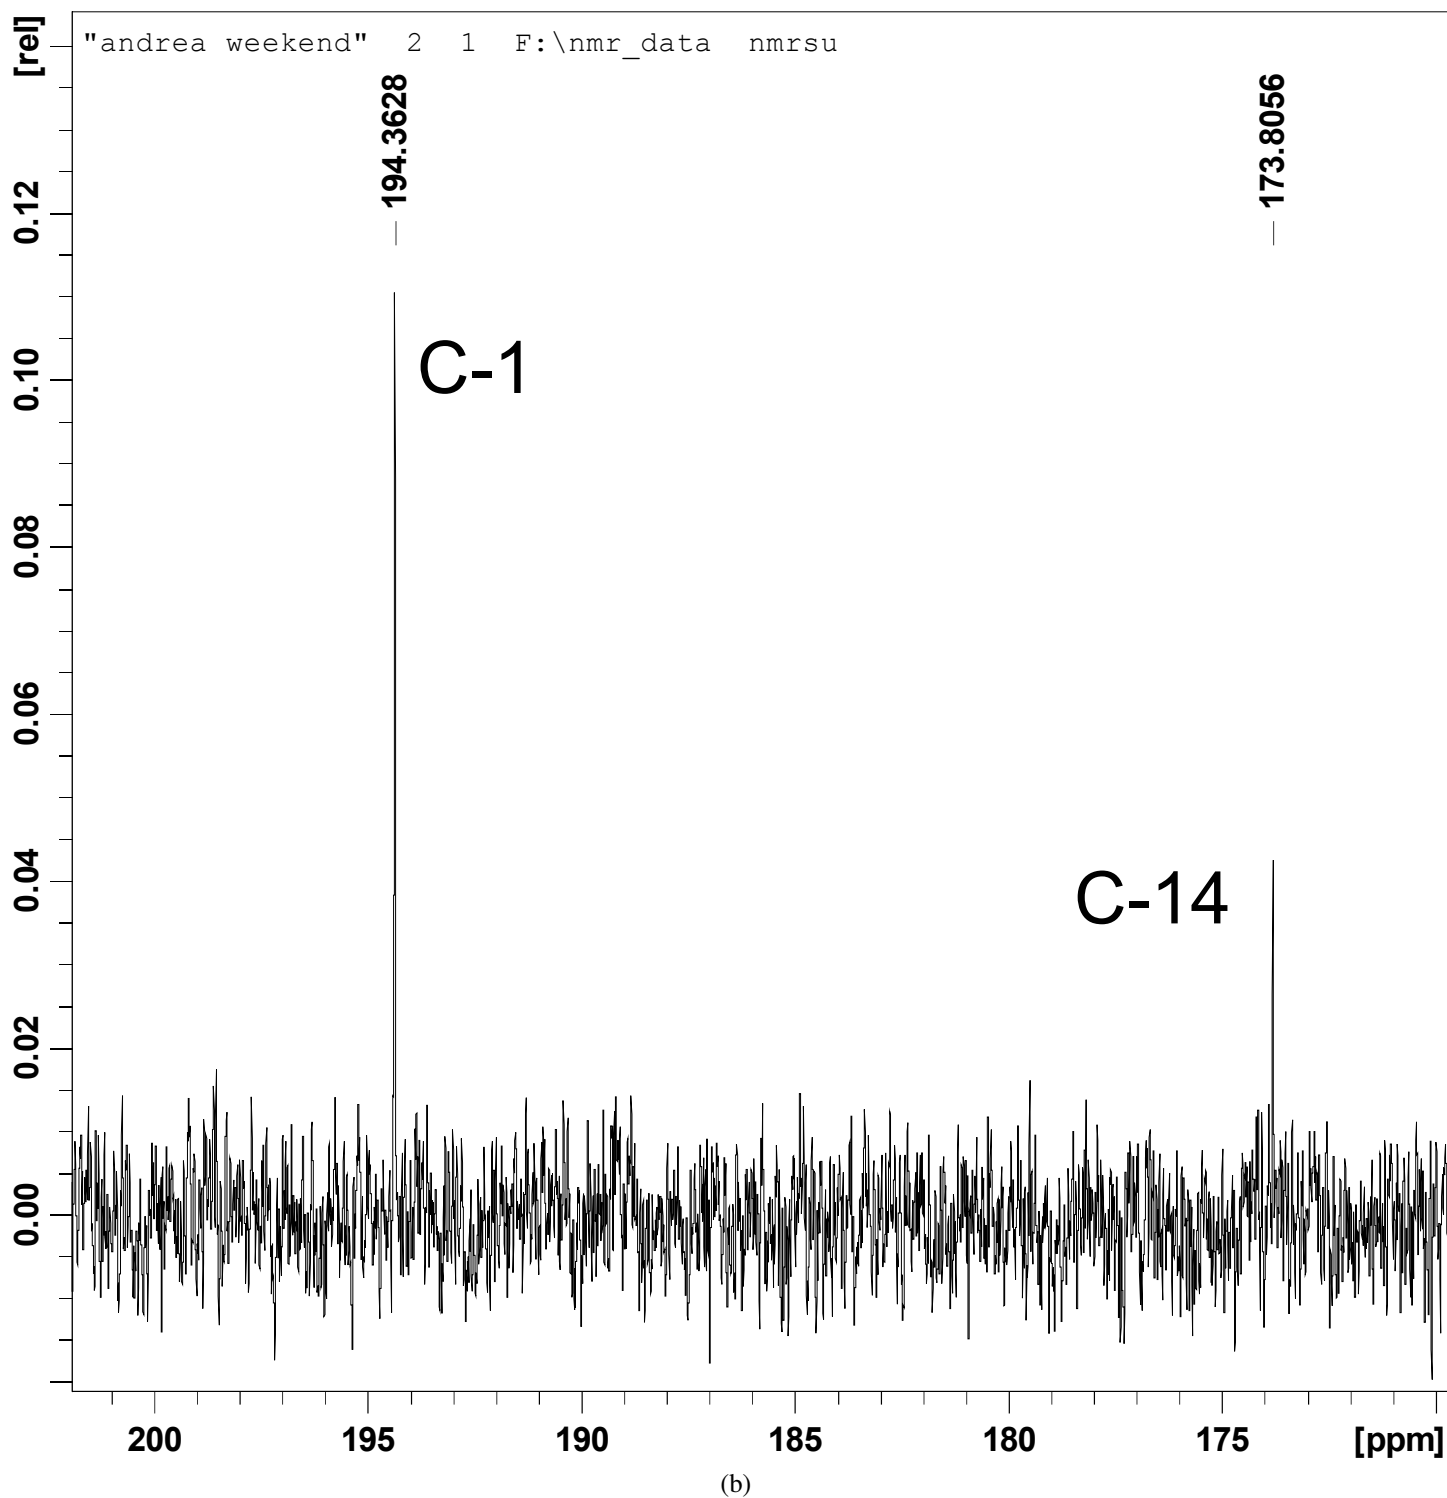

Figure S2 continued.

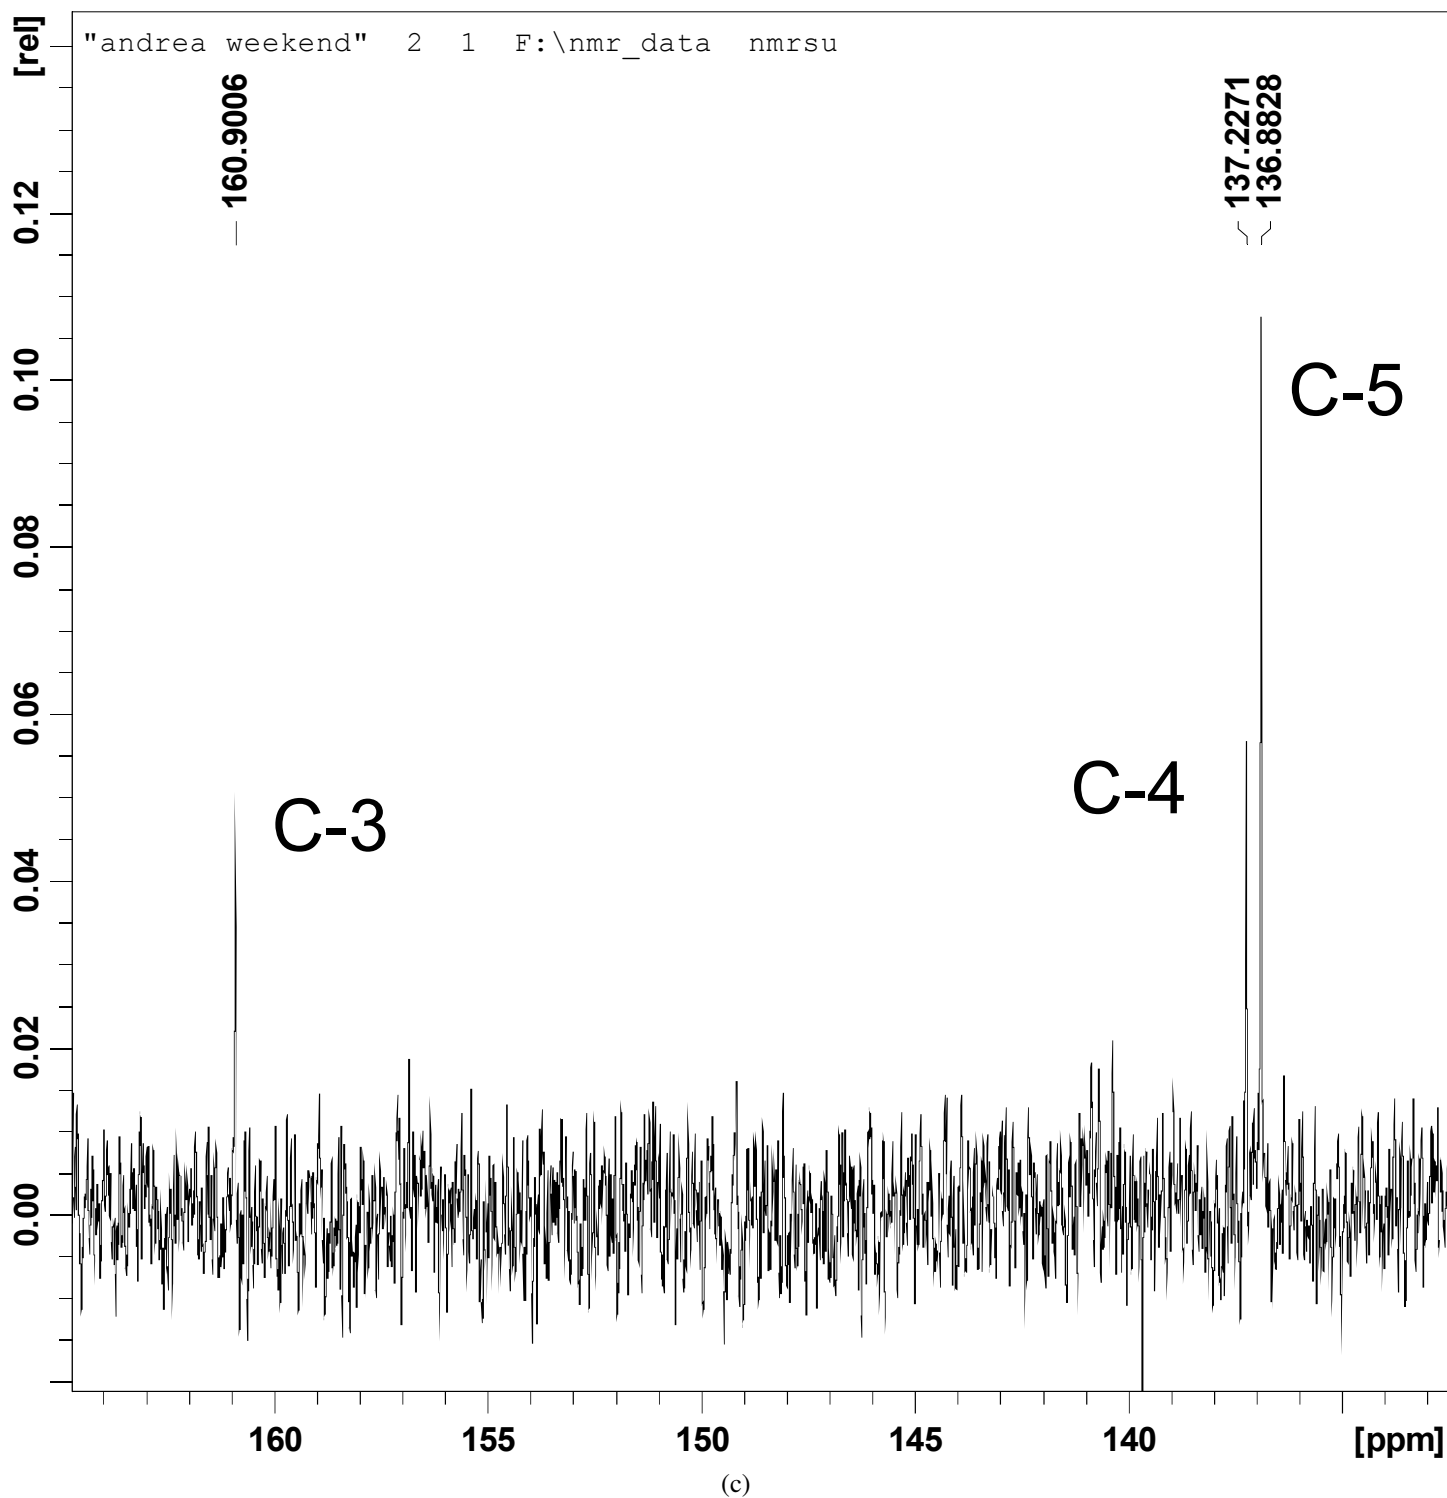

Figure S2 continued.

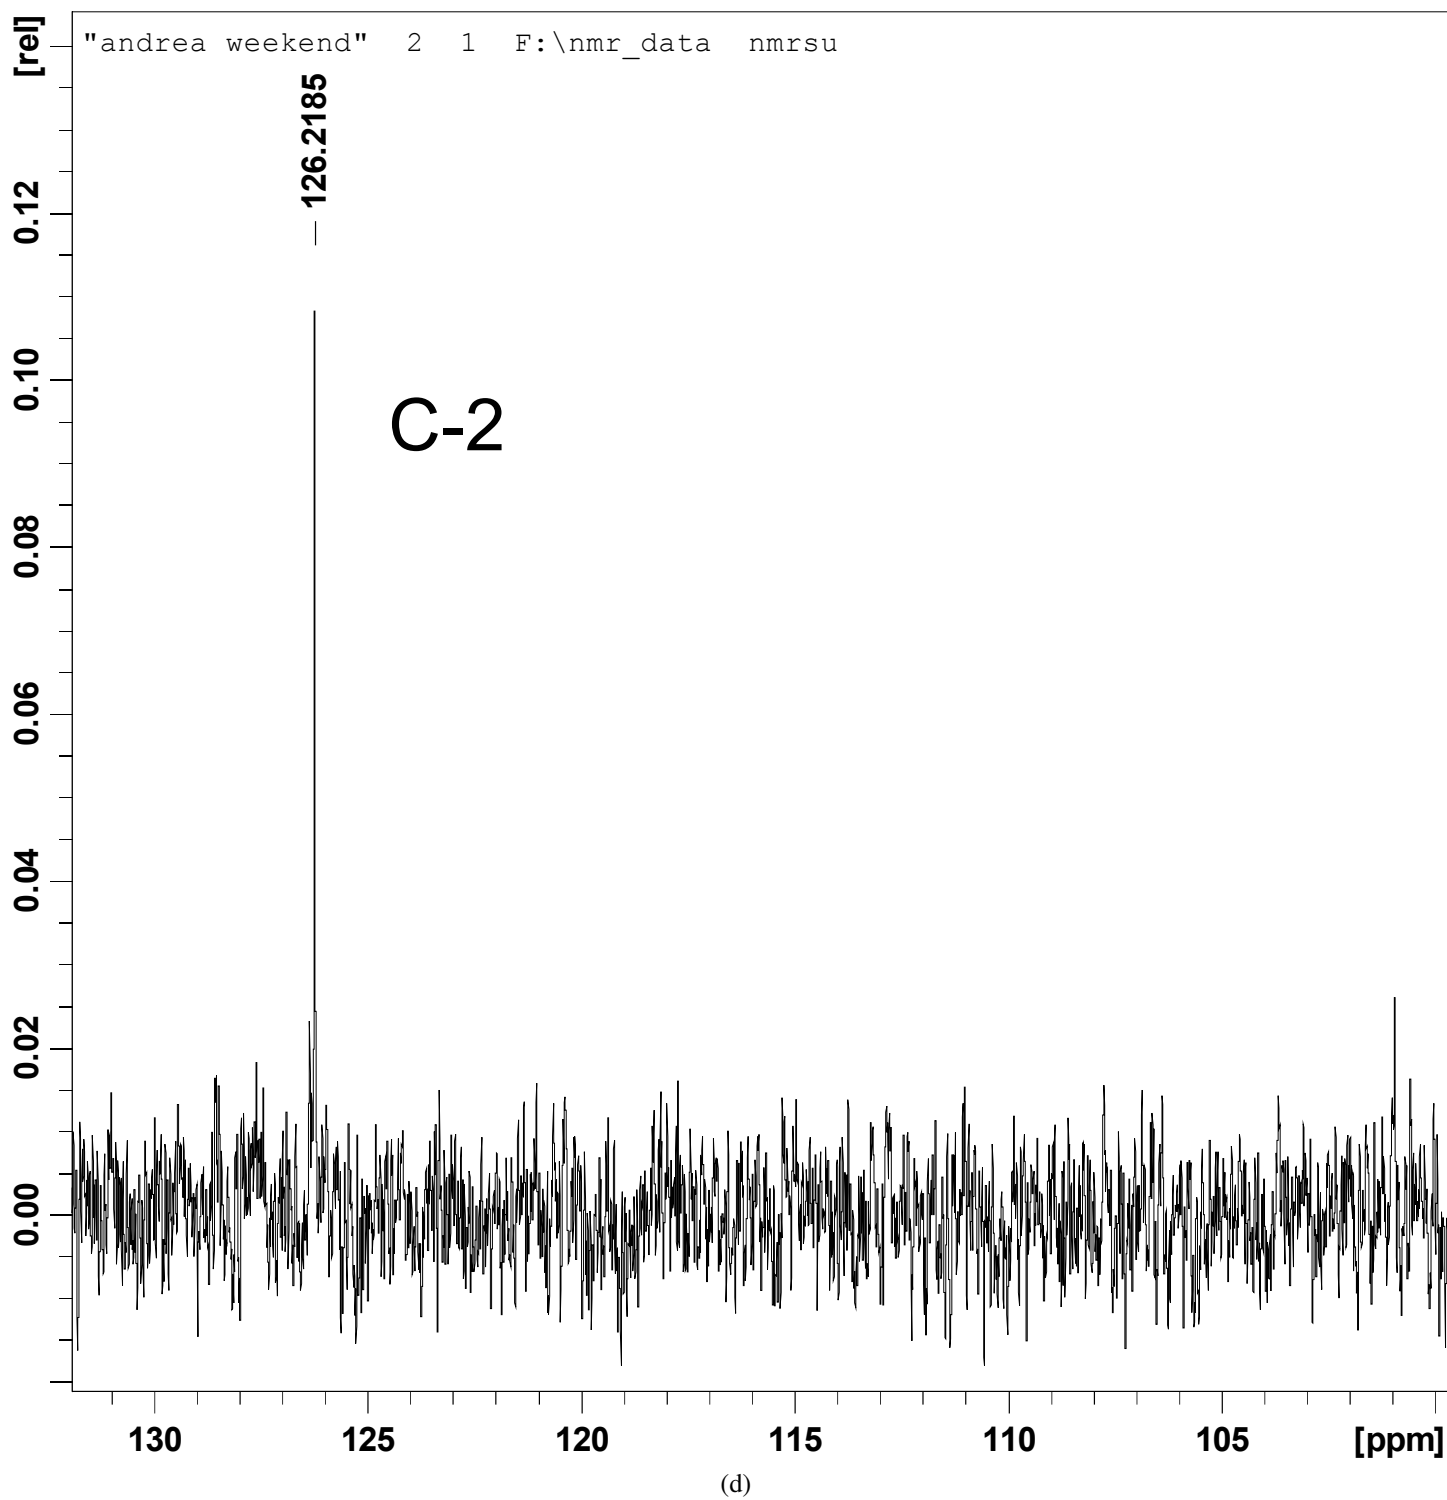

Figure S2 continued.

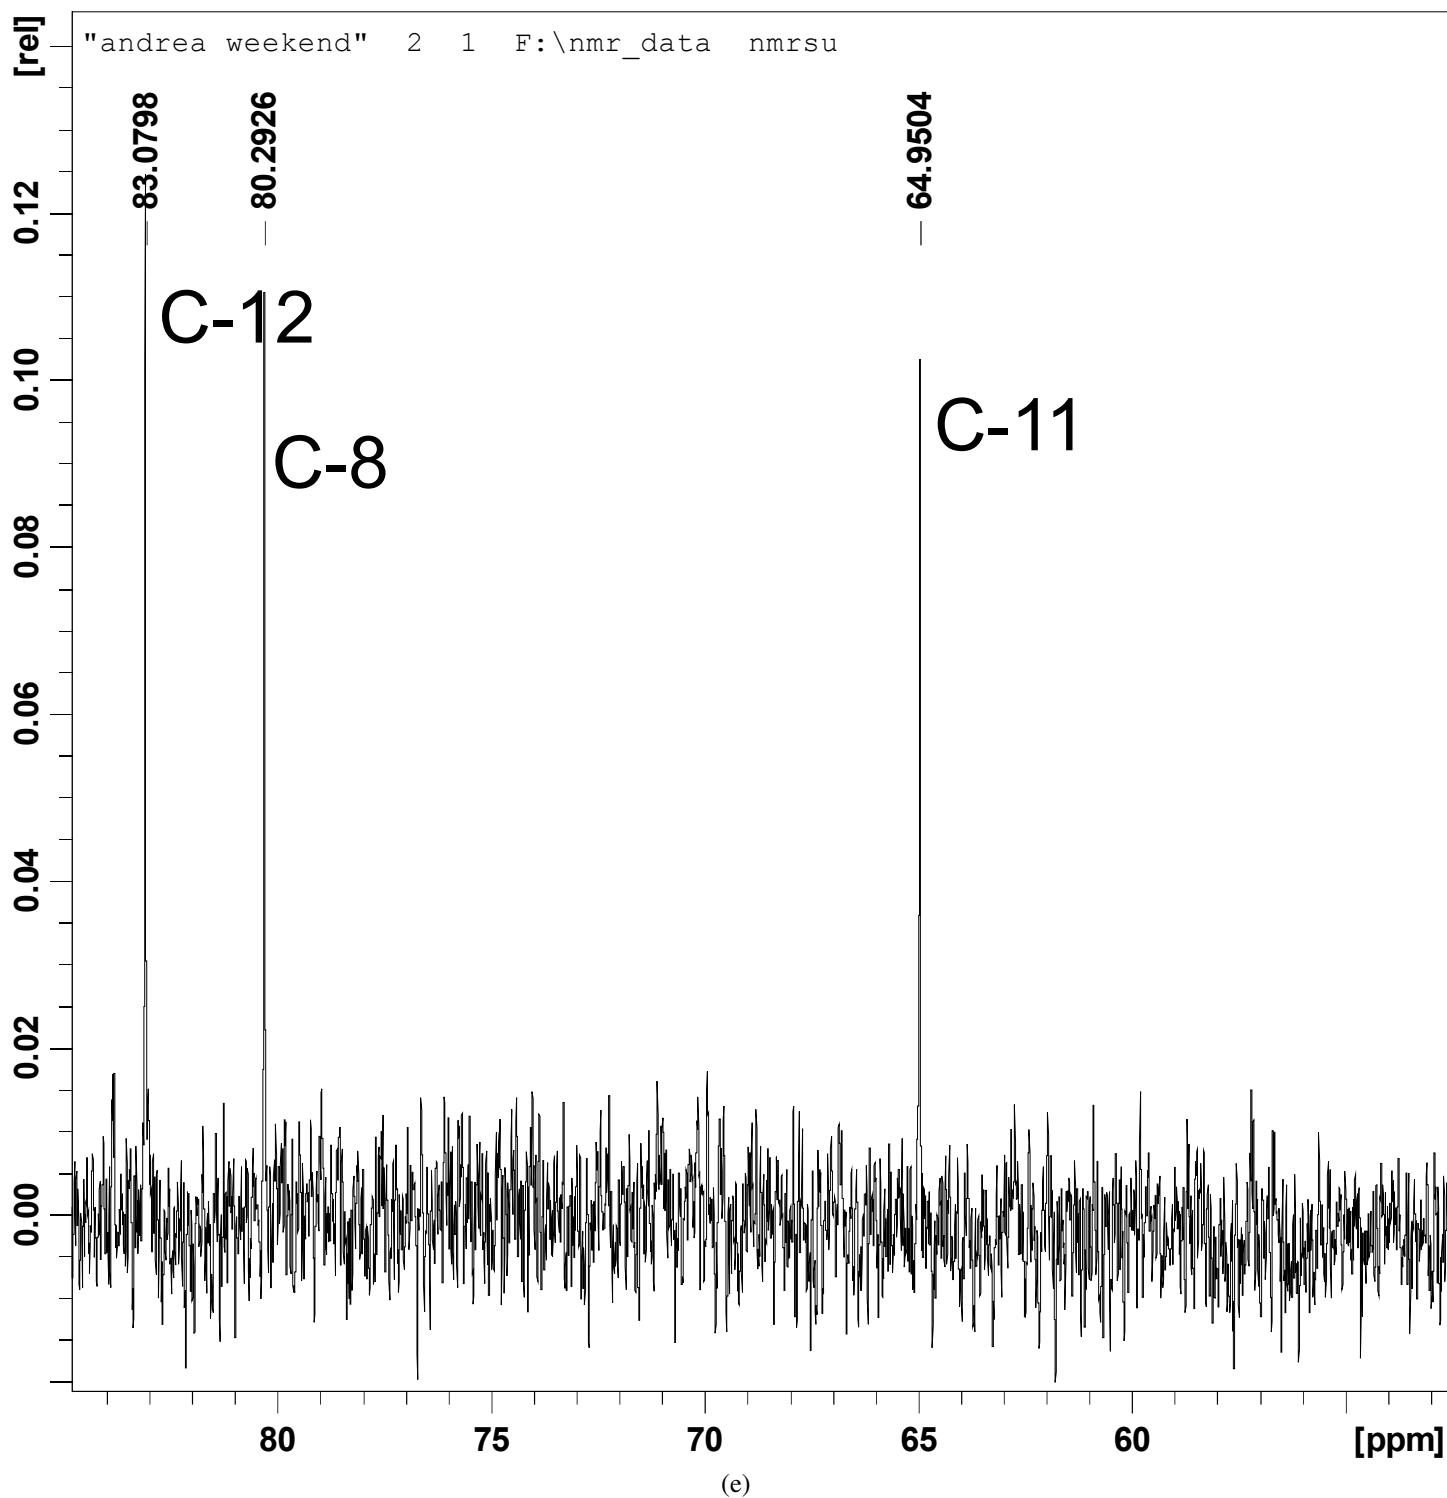

Figure S2 continued.

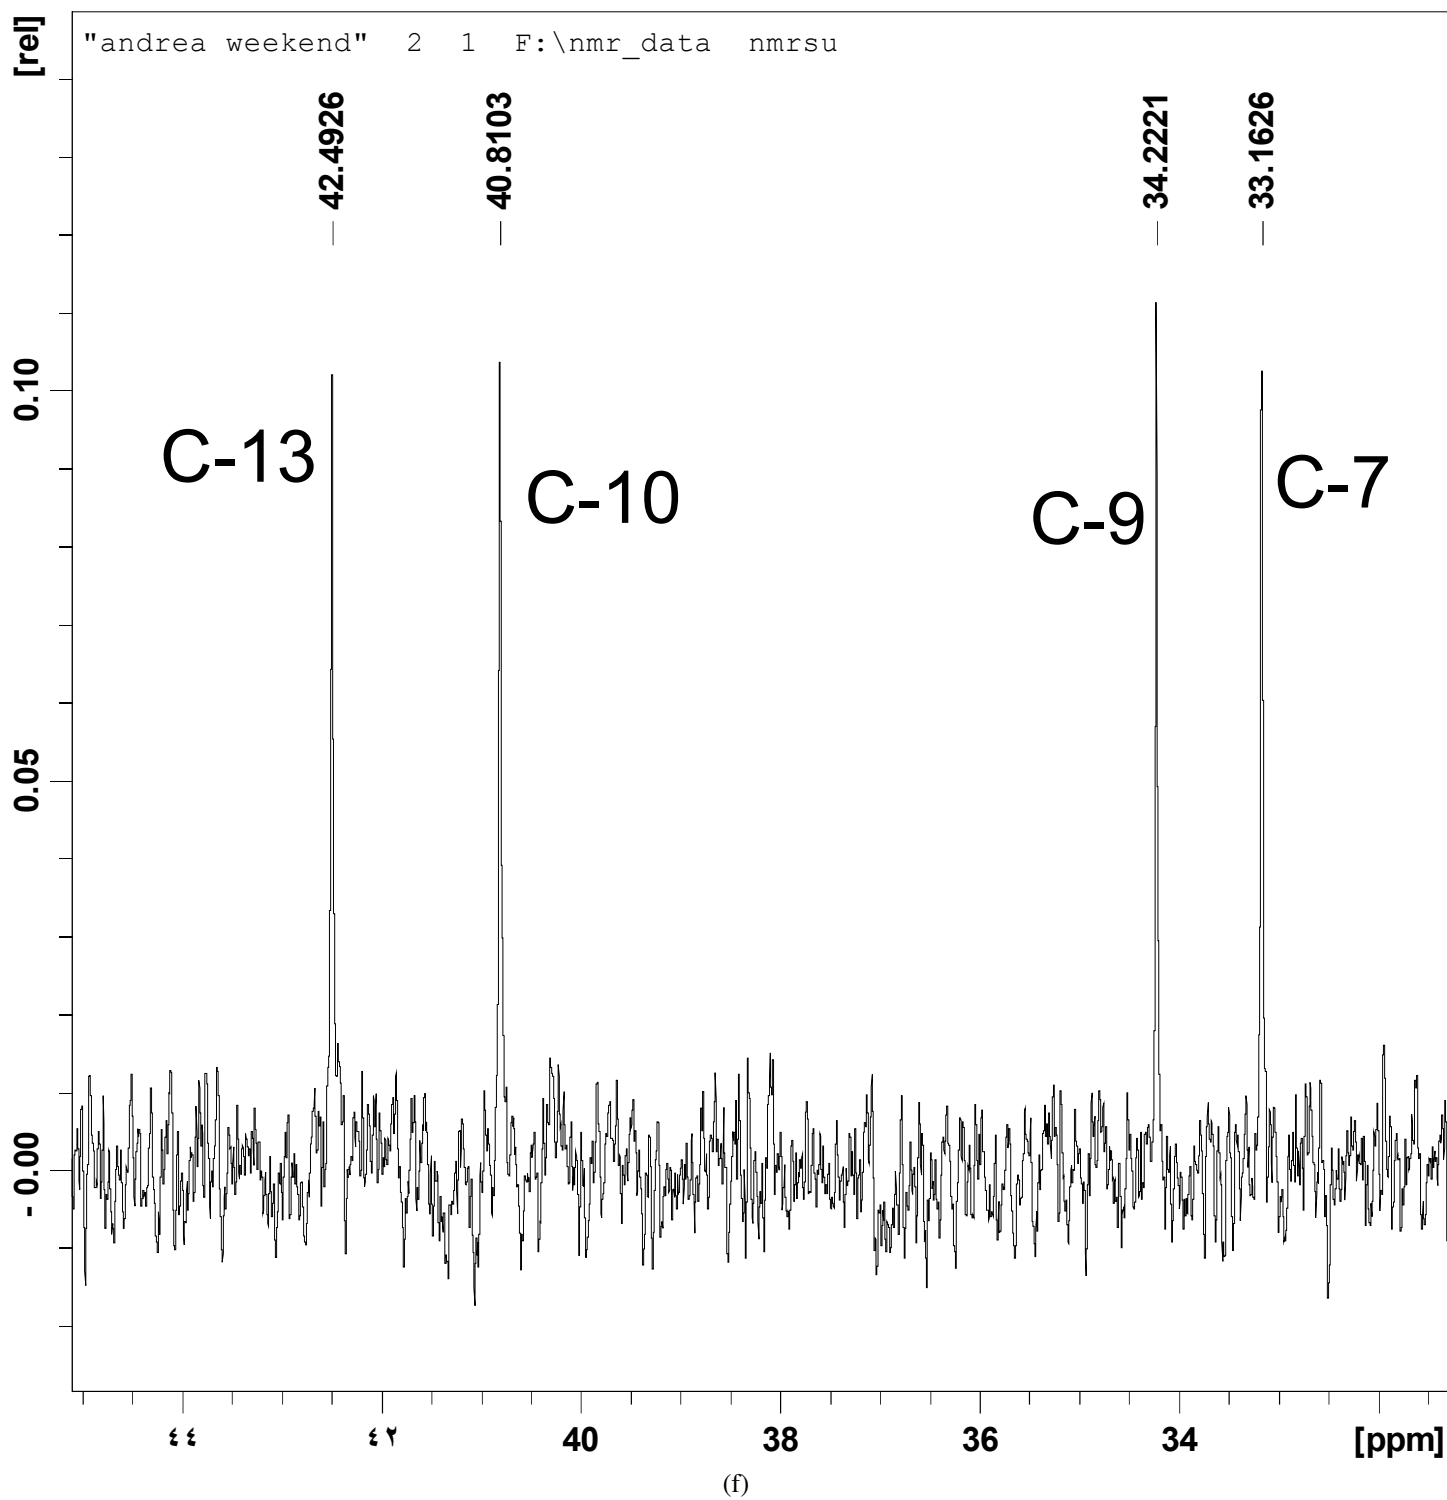

Figure S2 continued.

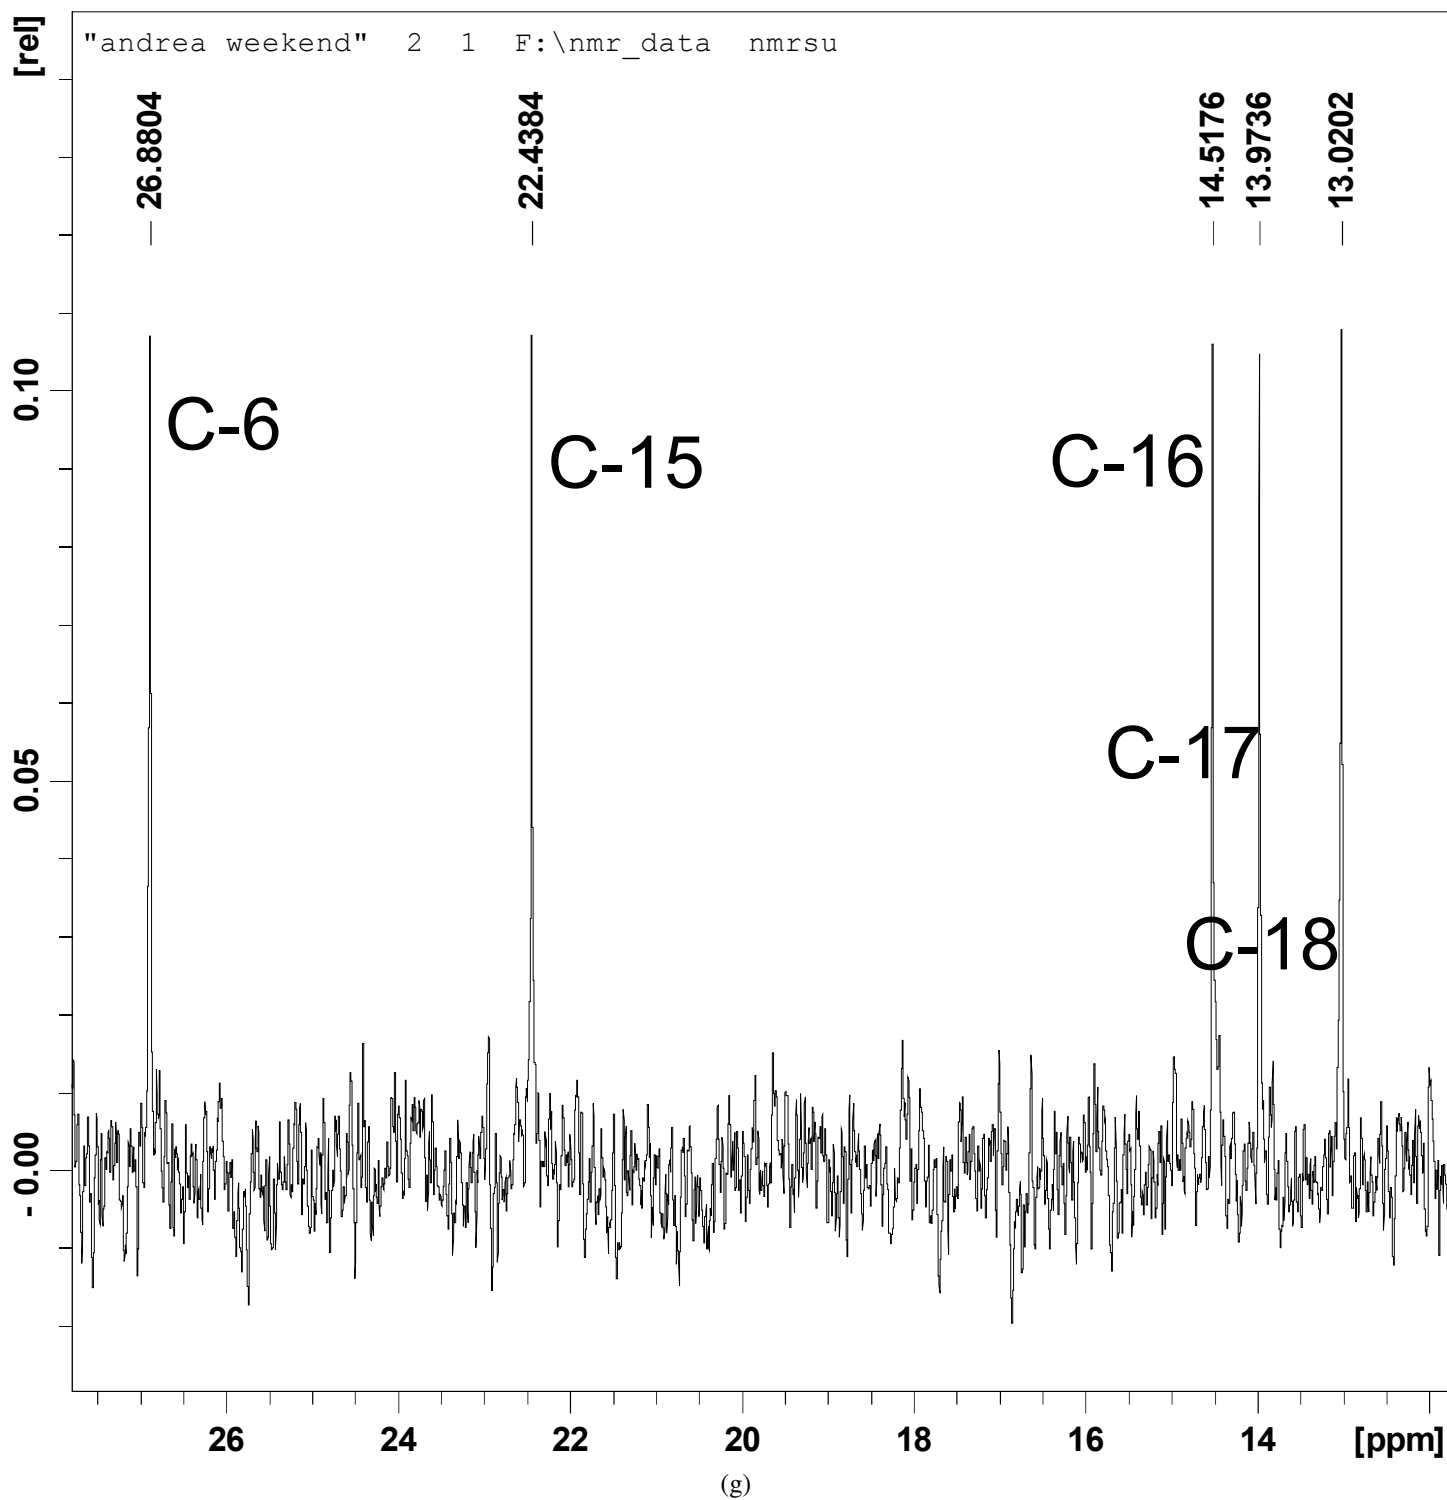

Figure S2 continued.

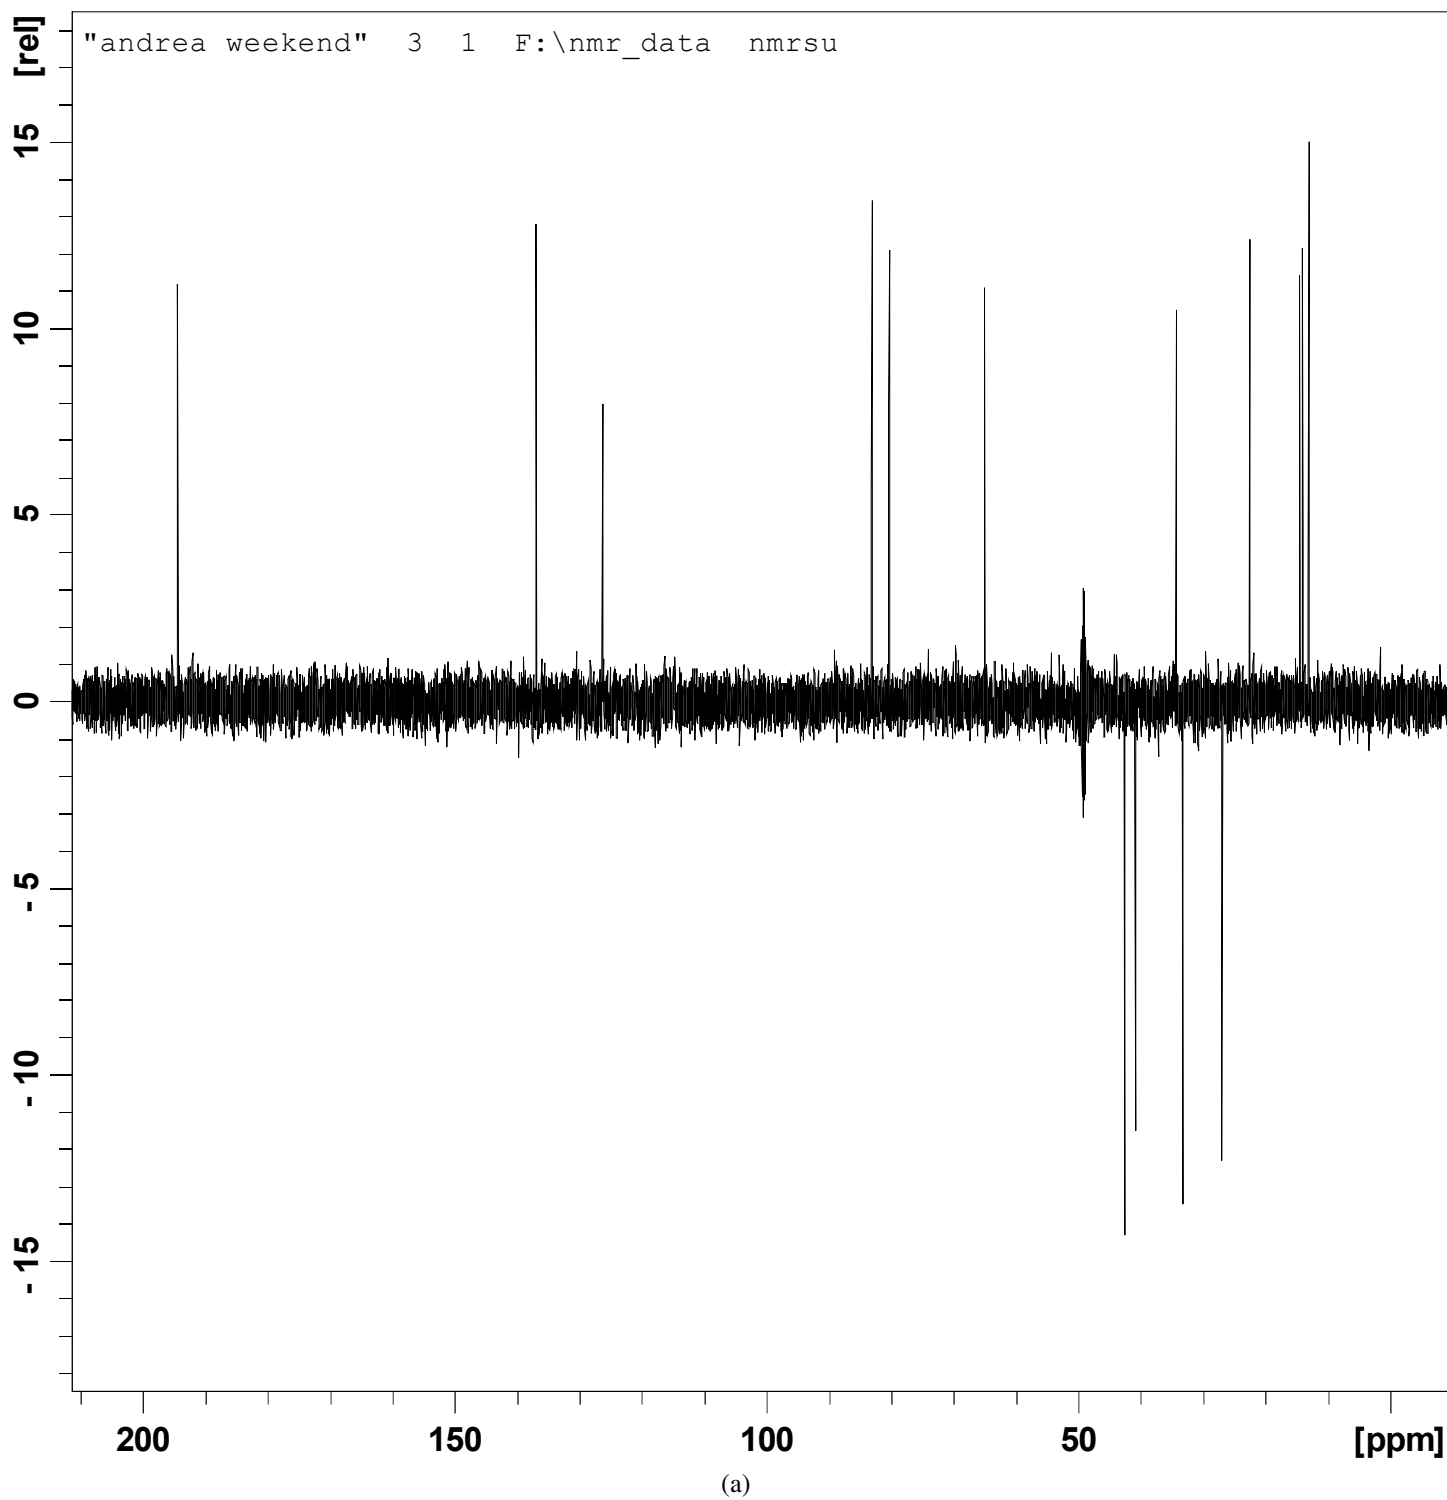

Figure S3. DEPT spectrum of brevisamide (**1**). a- Full spectrum. b-f- Details from various regions.



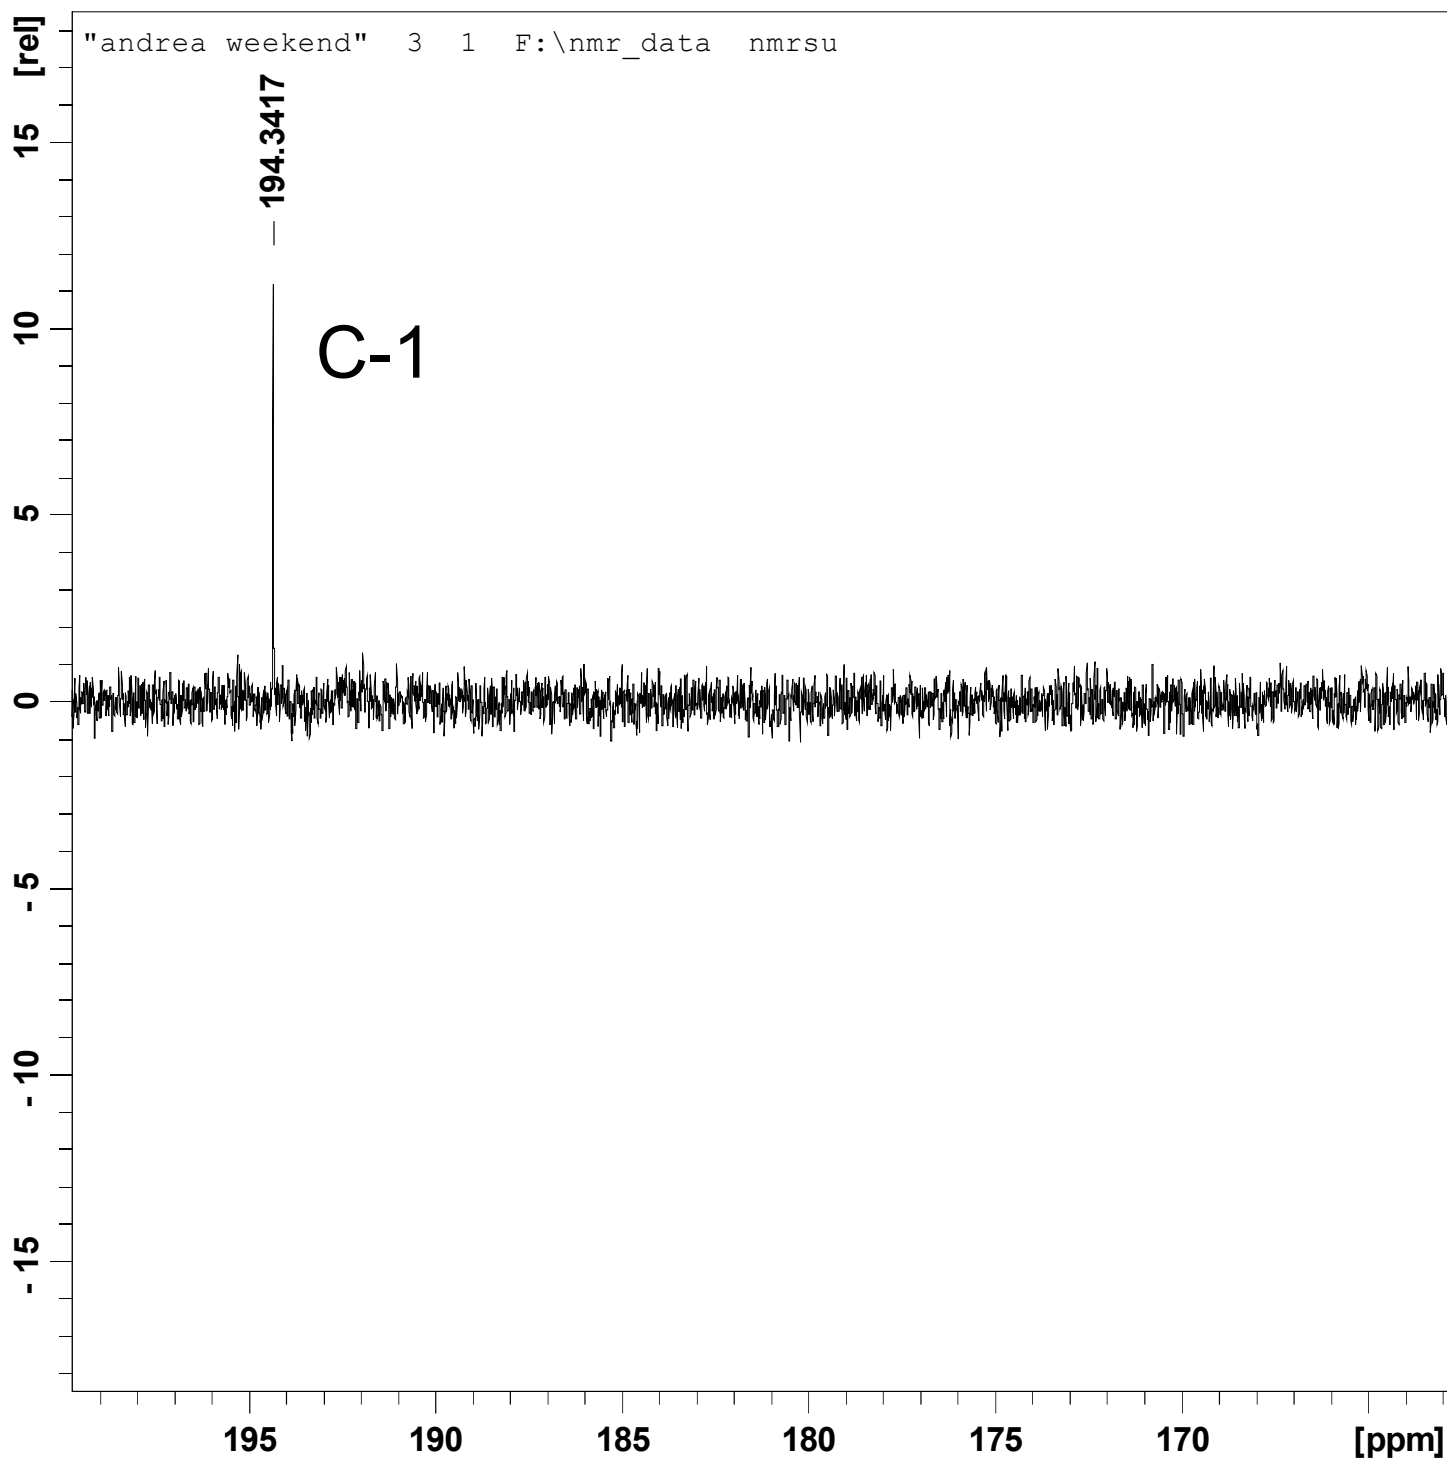

(b)

Figure S3 continued.

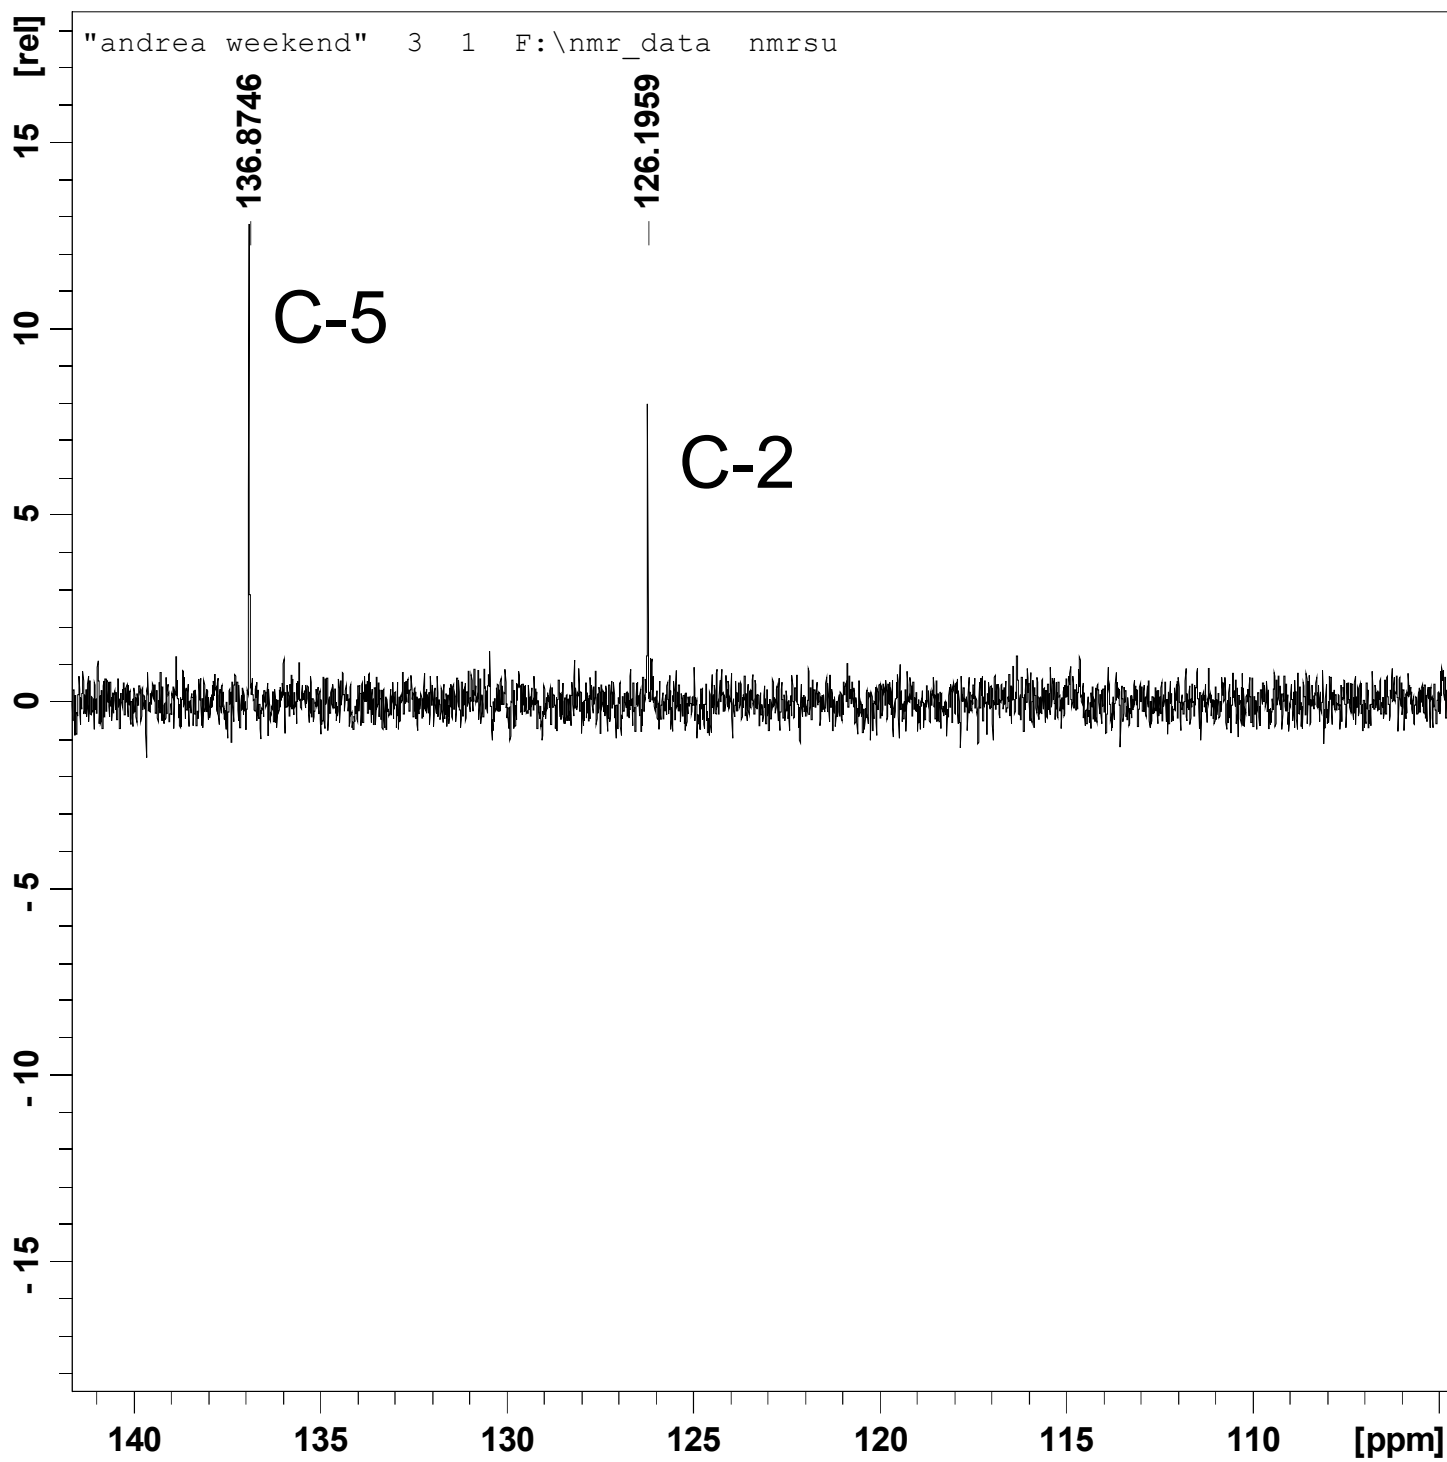

(c)

Figure S3 continued.

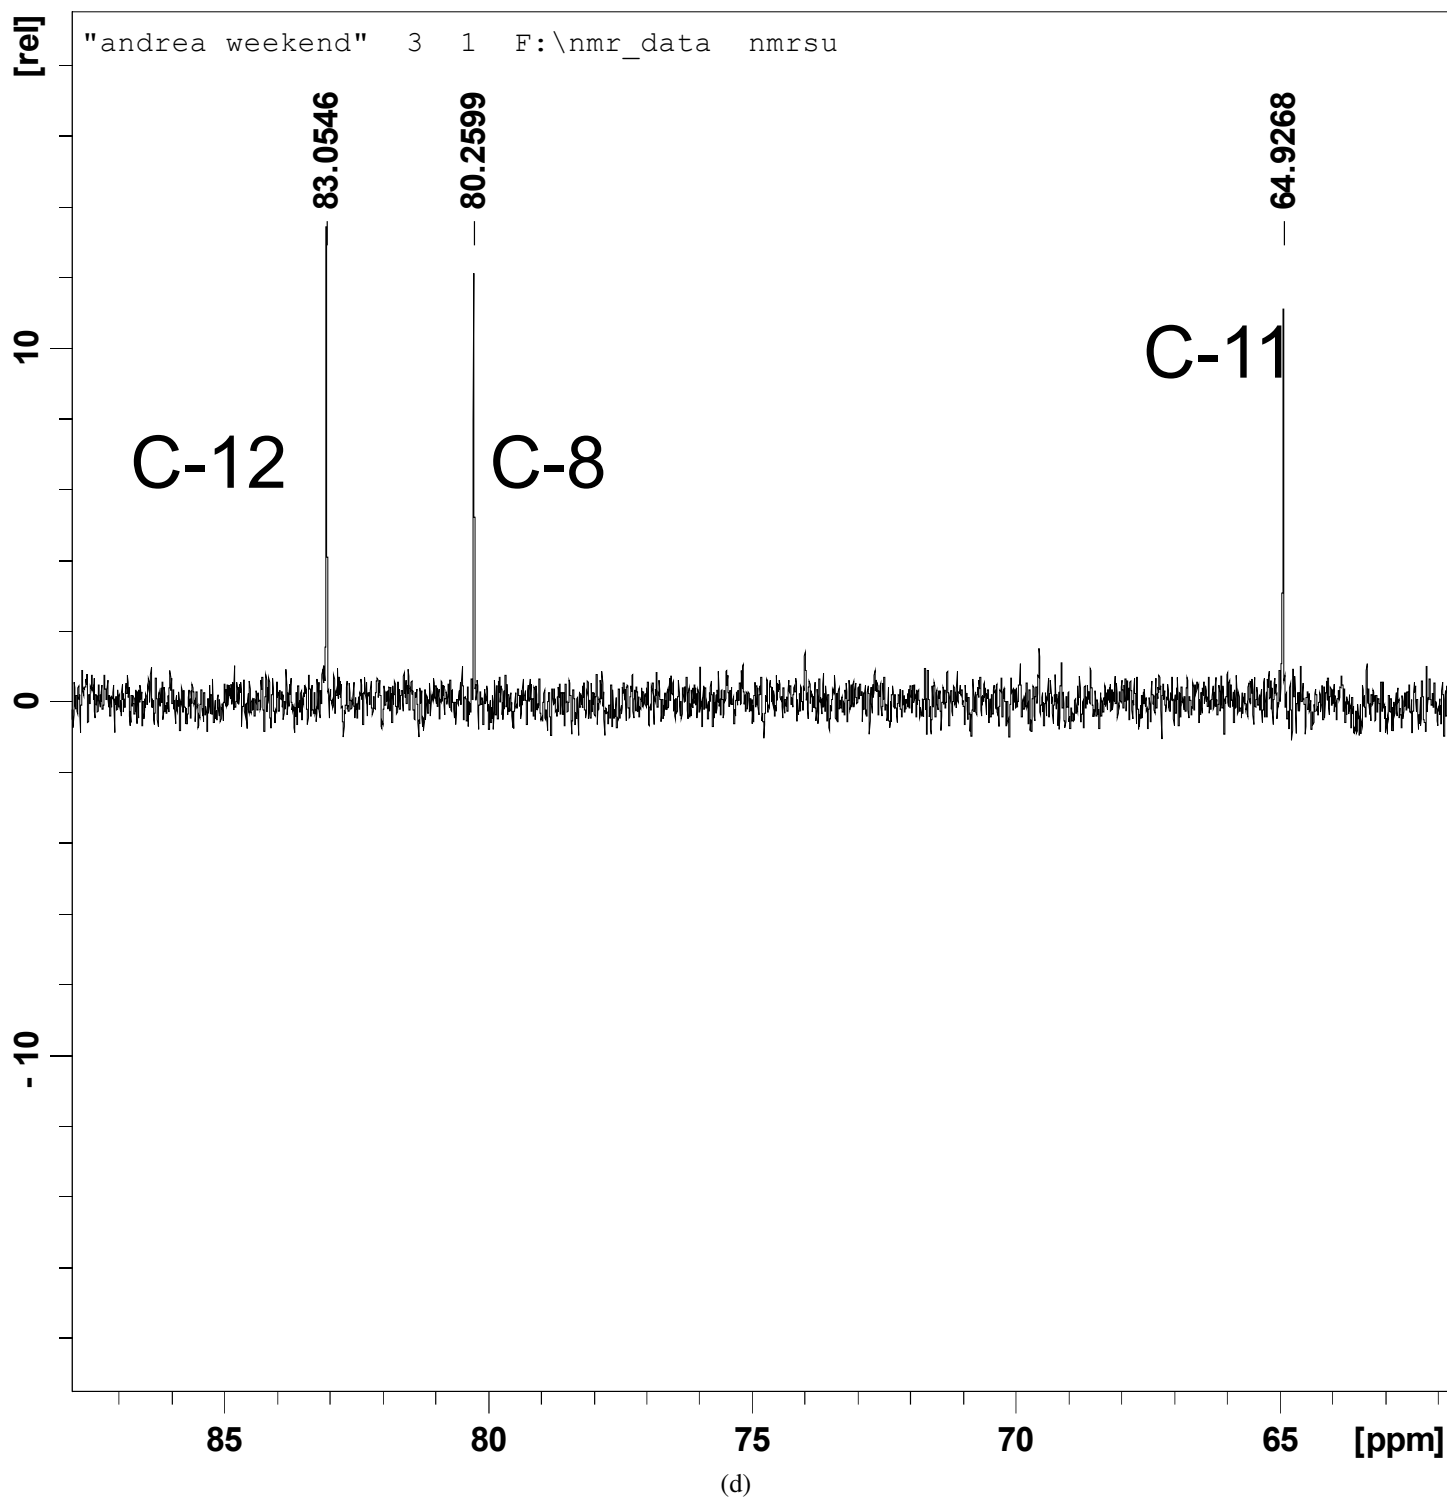

Figure S3 continued.

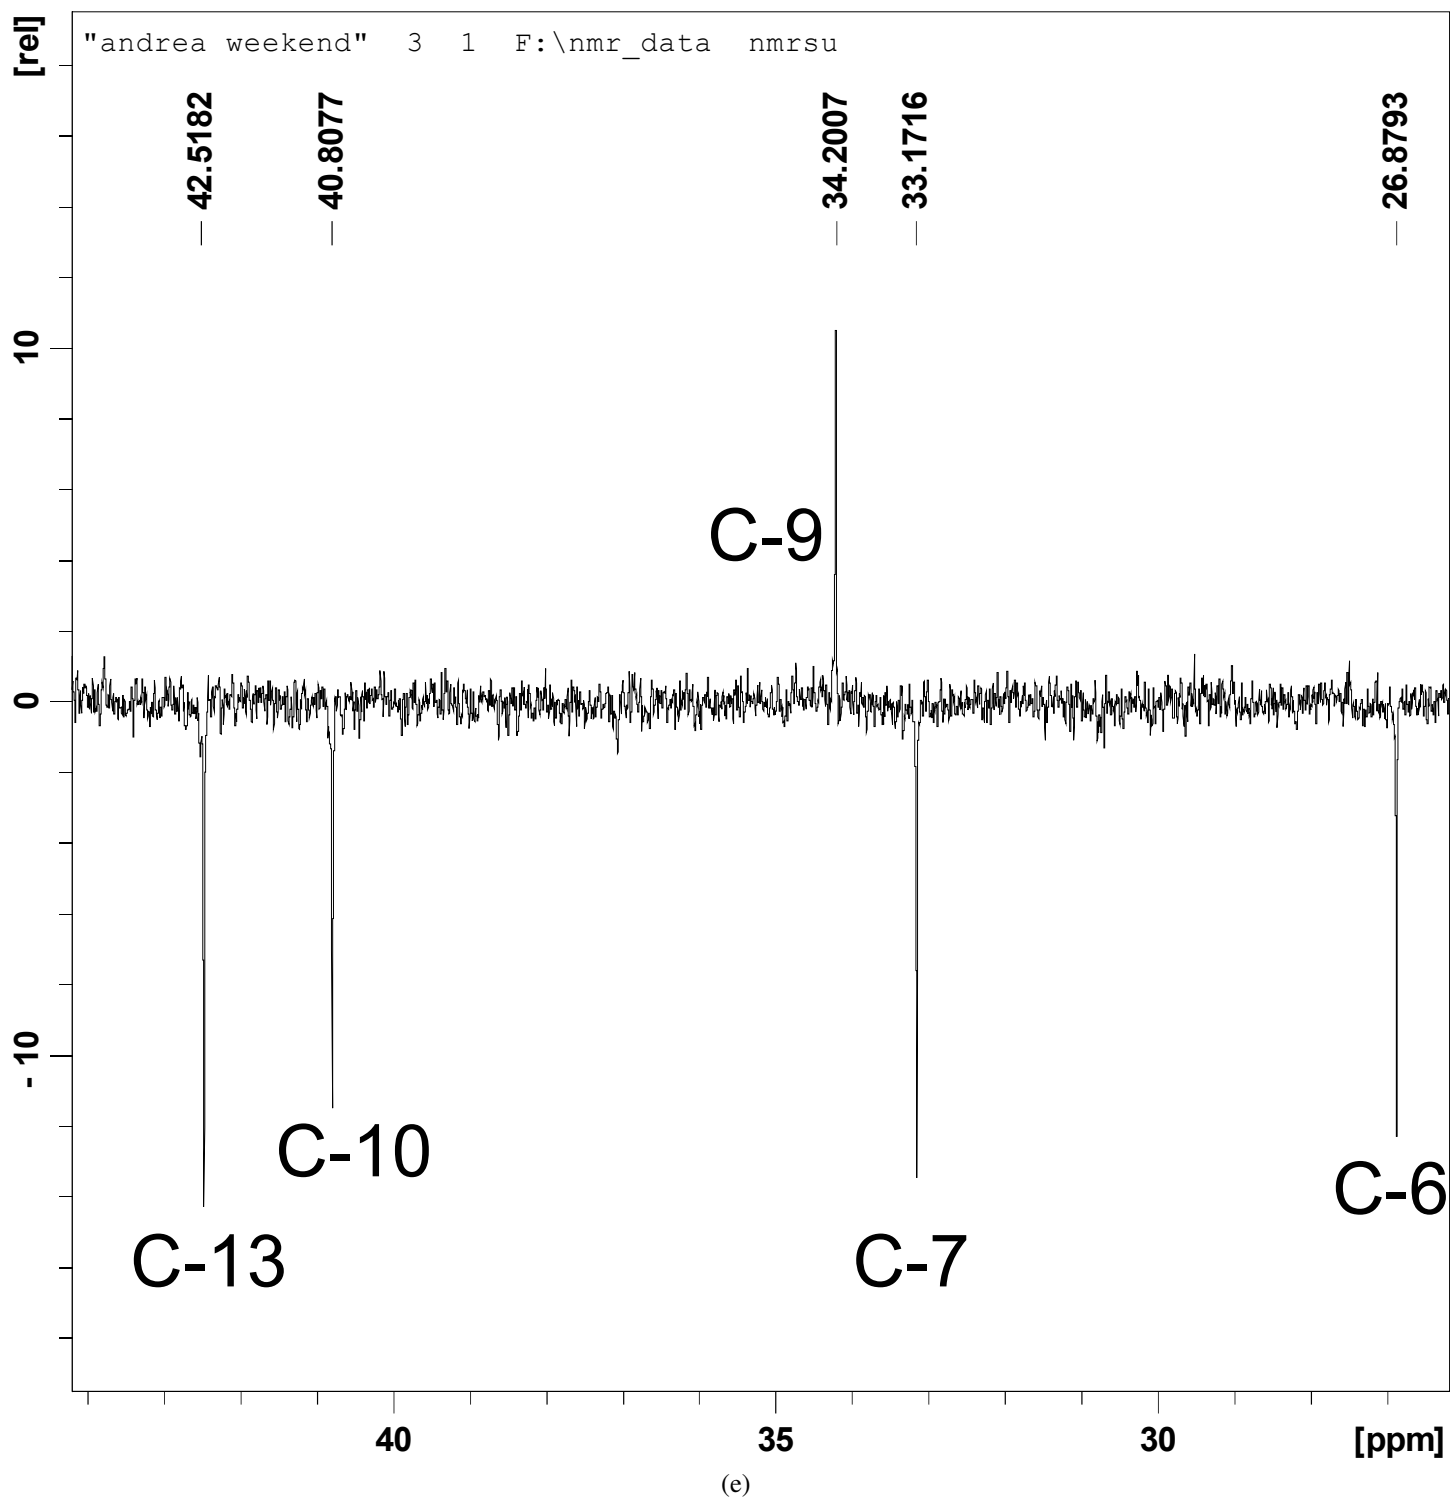

Figure S3 continued.

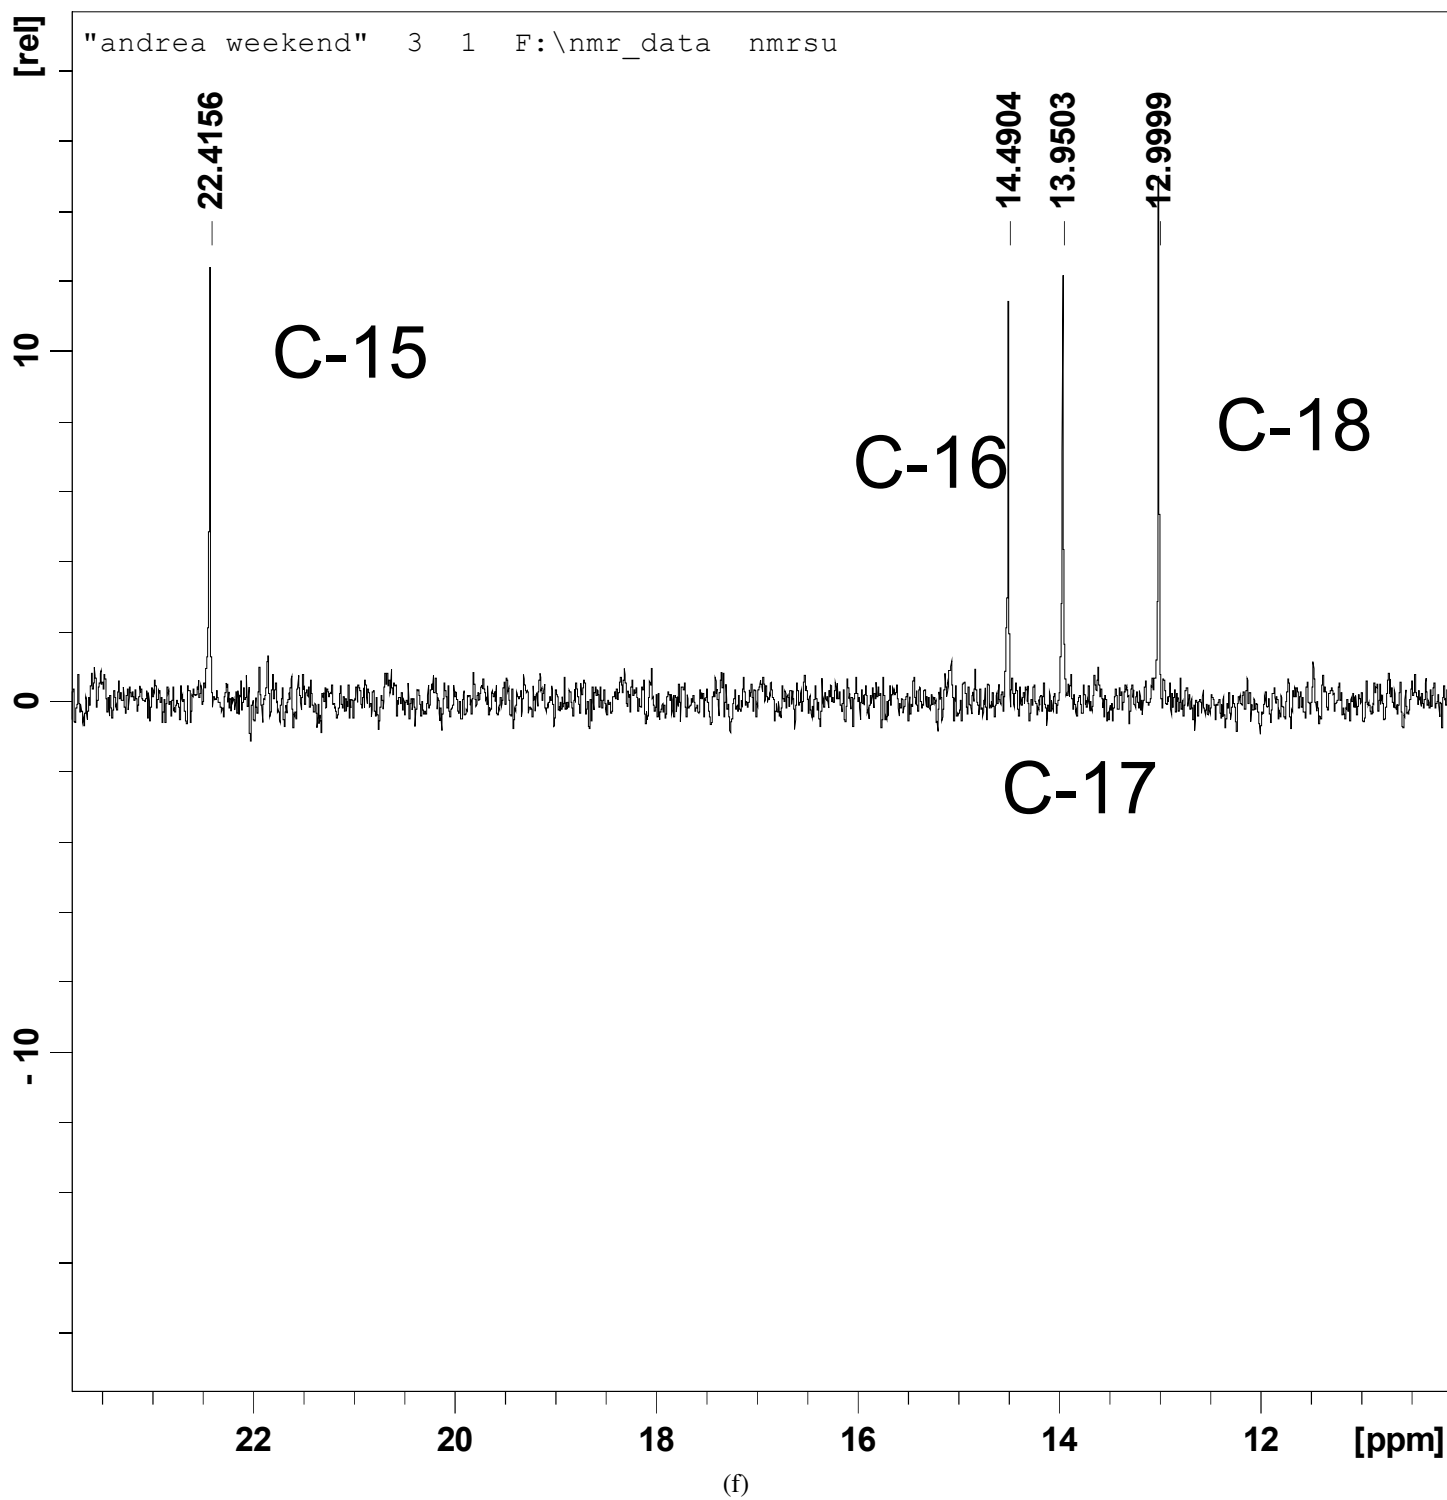

Figure S3 continued.

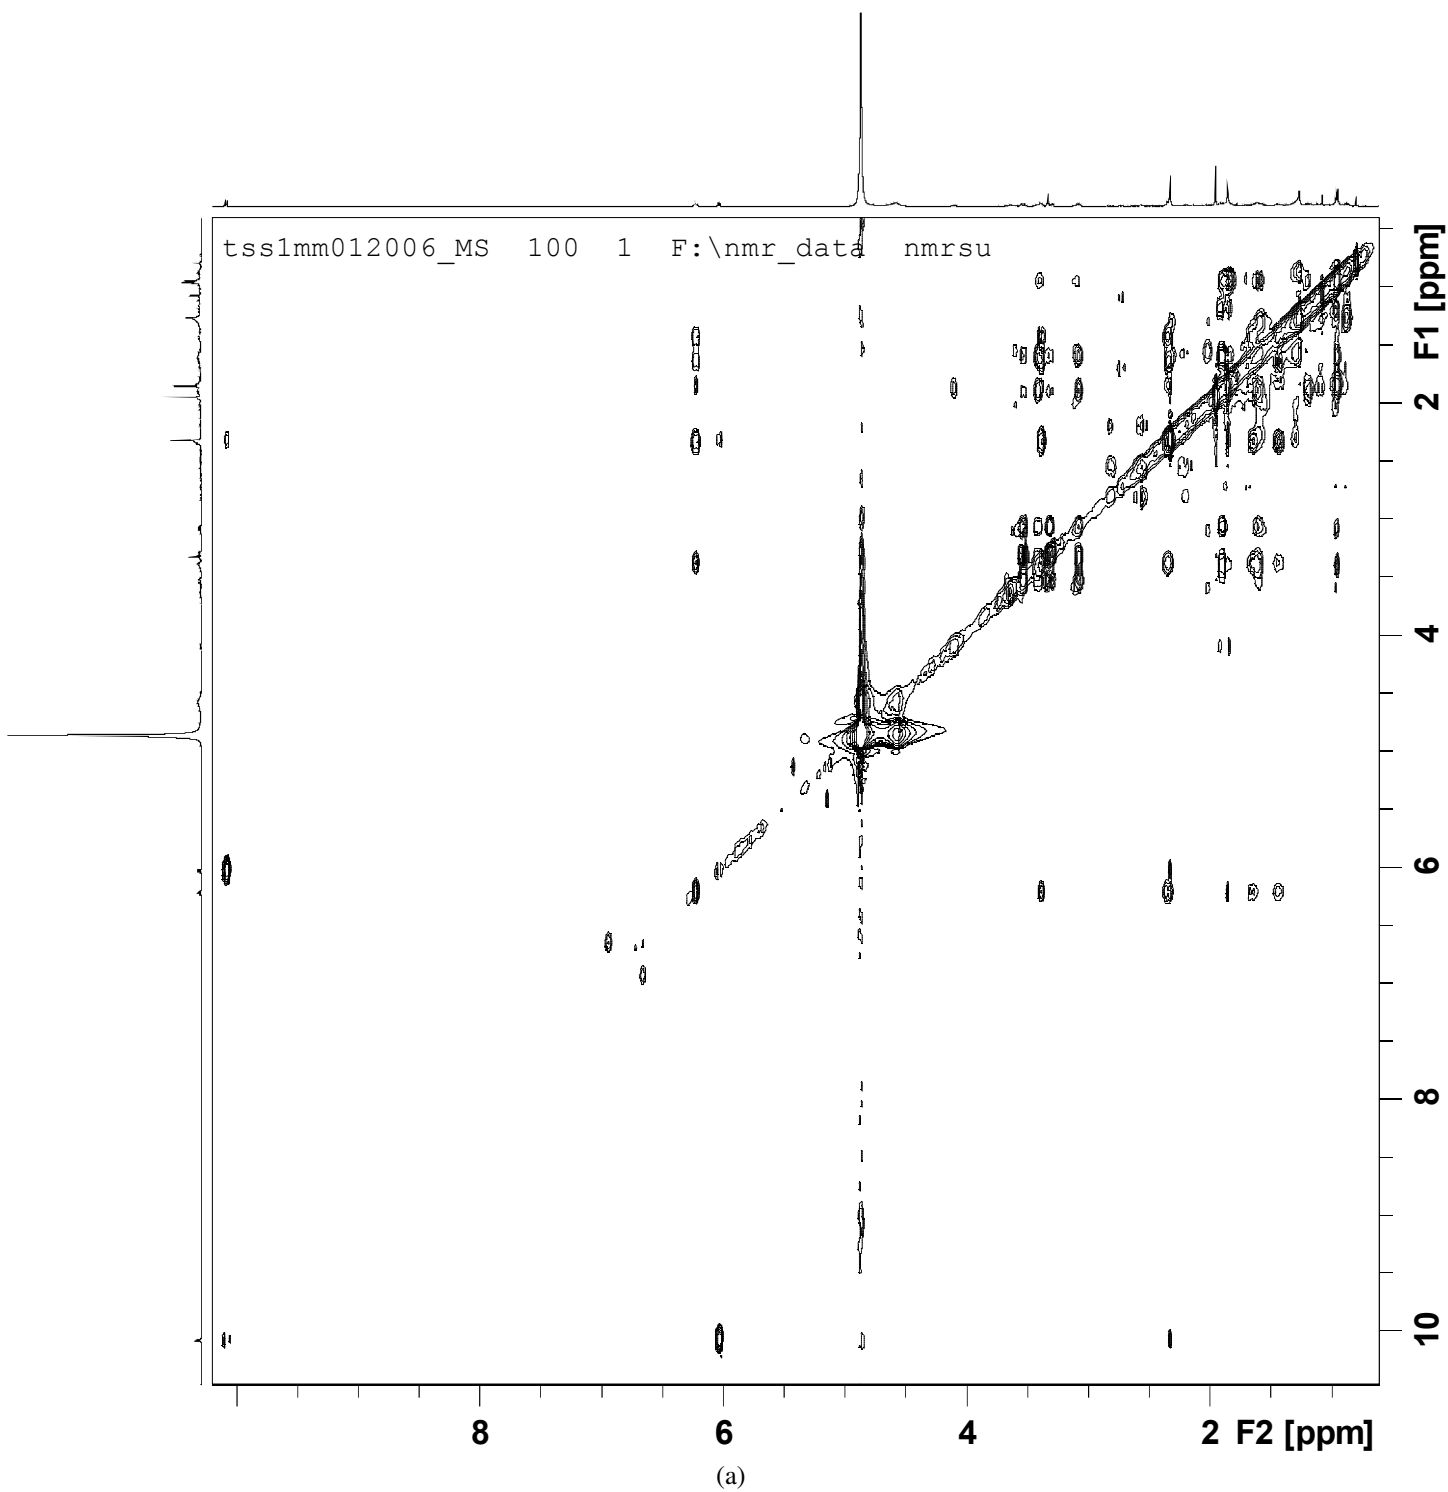

Figure S4. TOCSY spectrum of brevisamide (**1**). a- Full spectrum. b-d- Details from various regions.

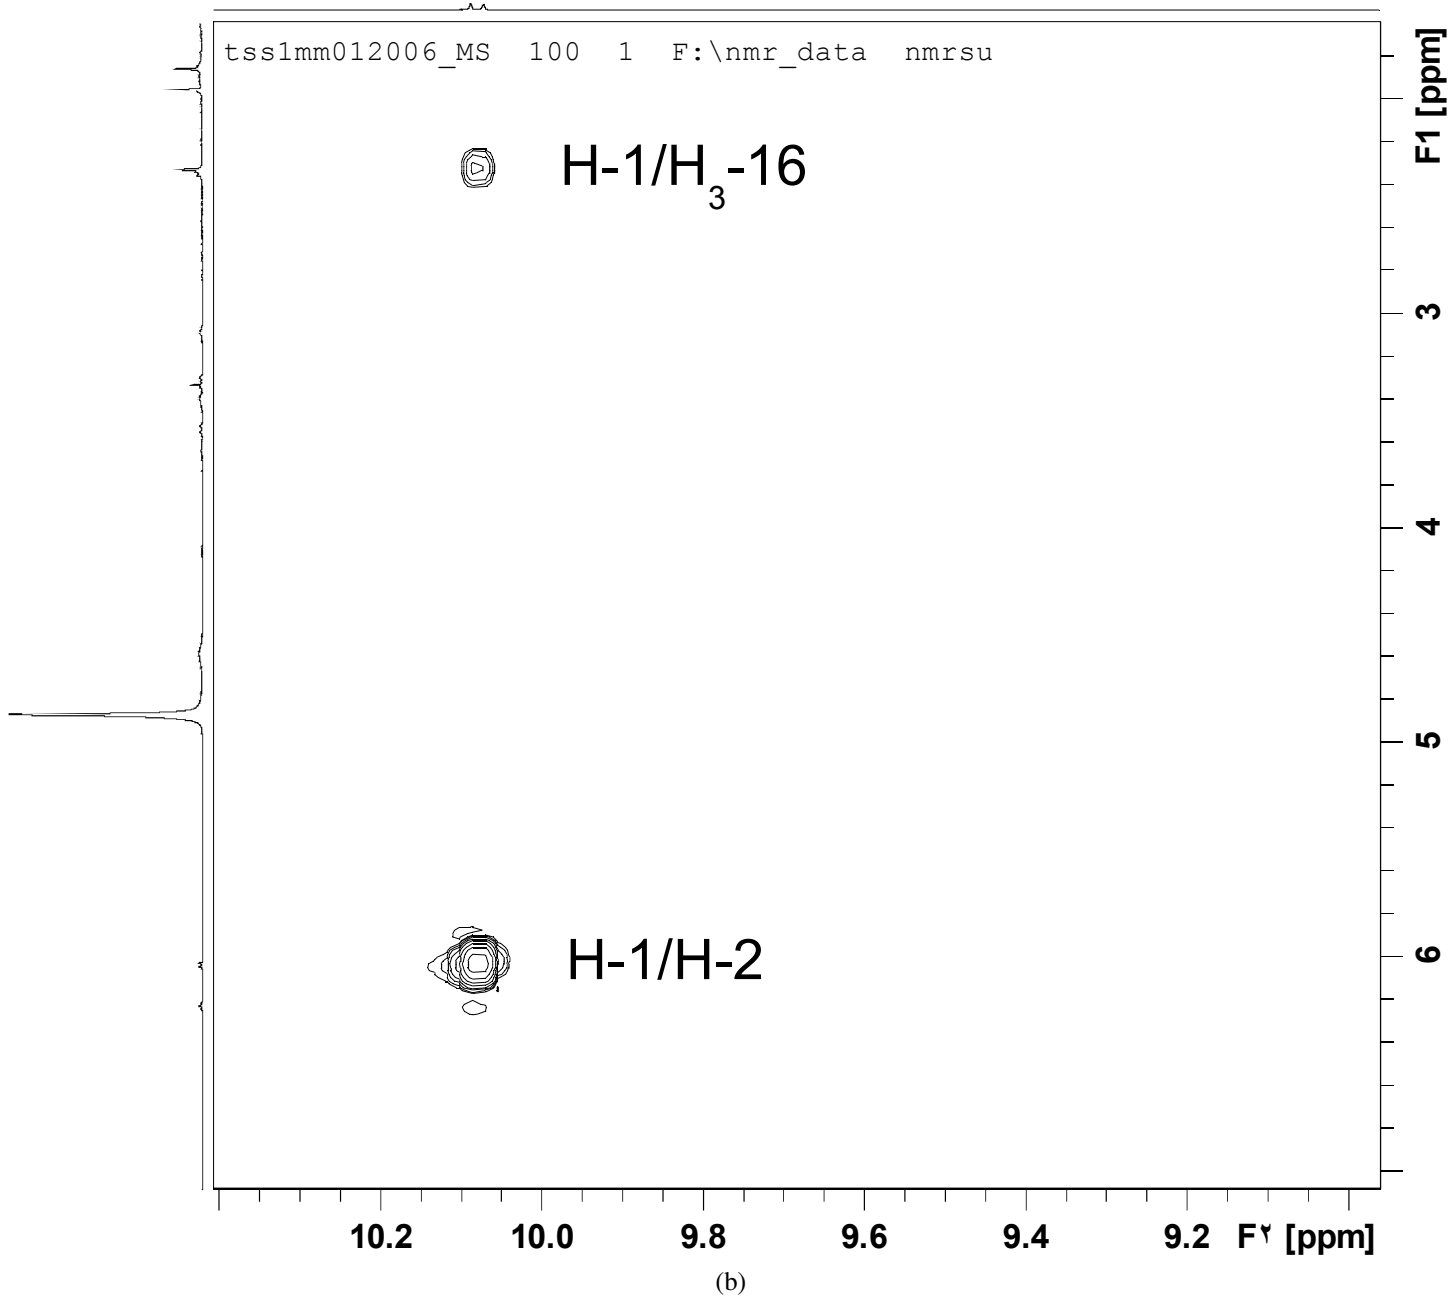

Figure S4 continued.

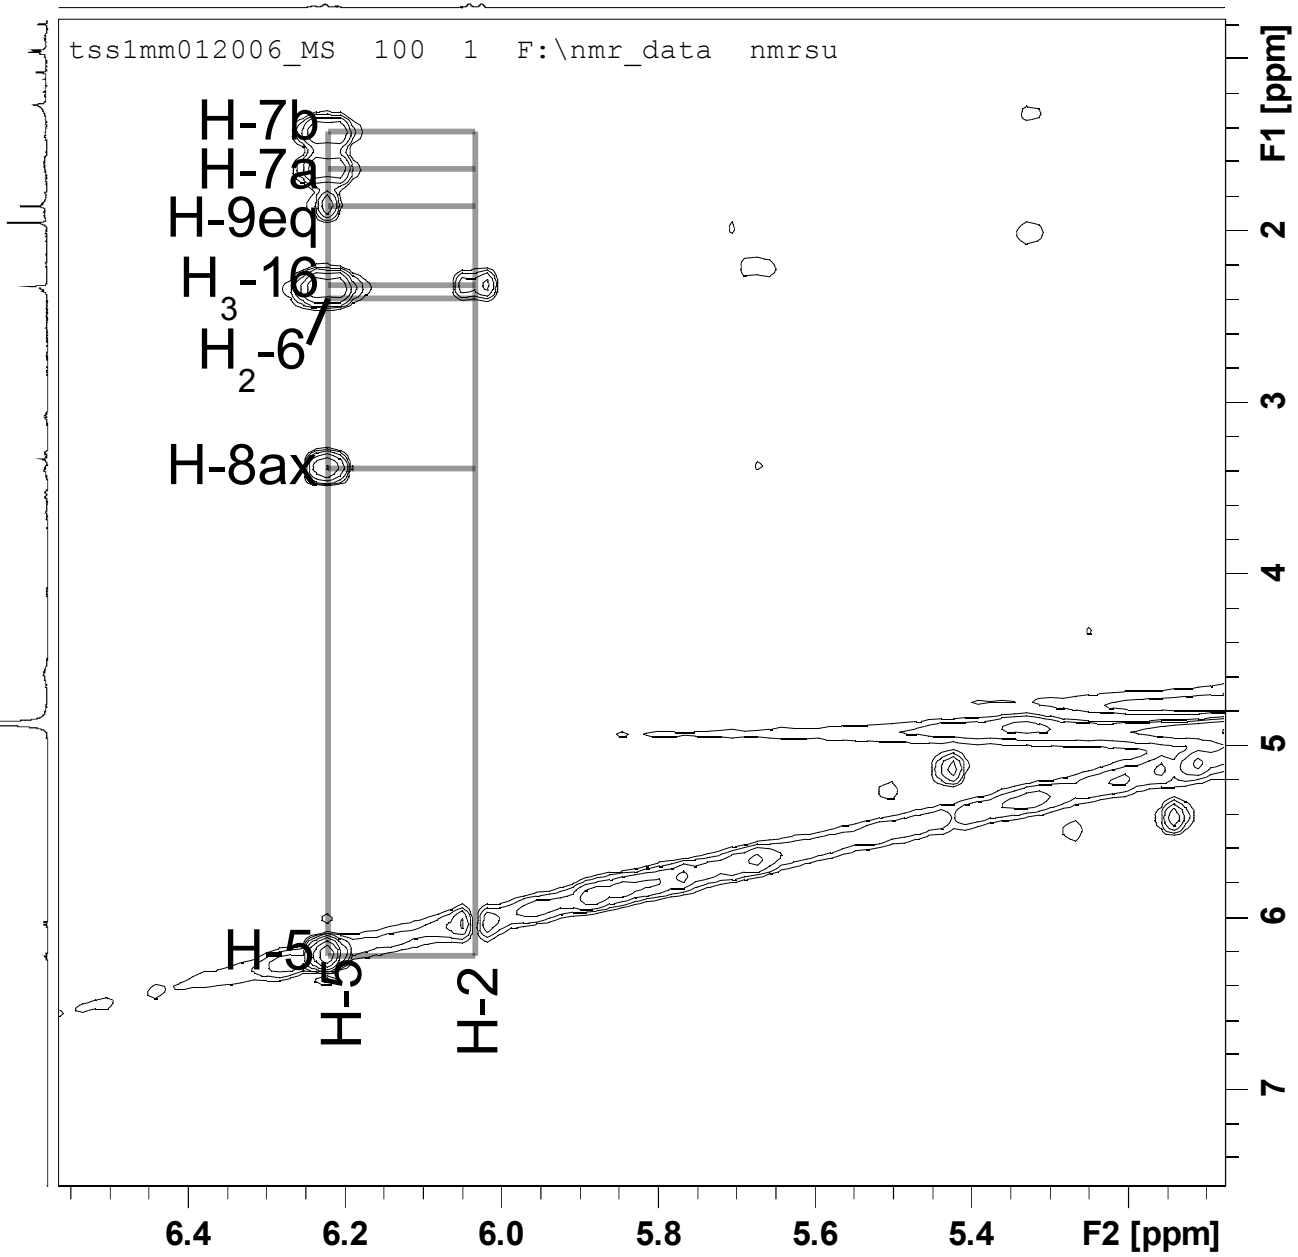

(c)

Figure S4 continued.



tss1mm012006\_MS 100 1 F:\nmr\_data nmrsu

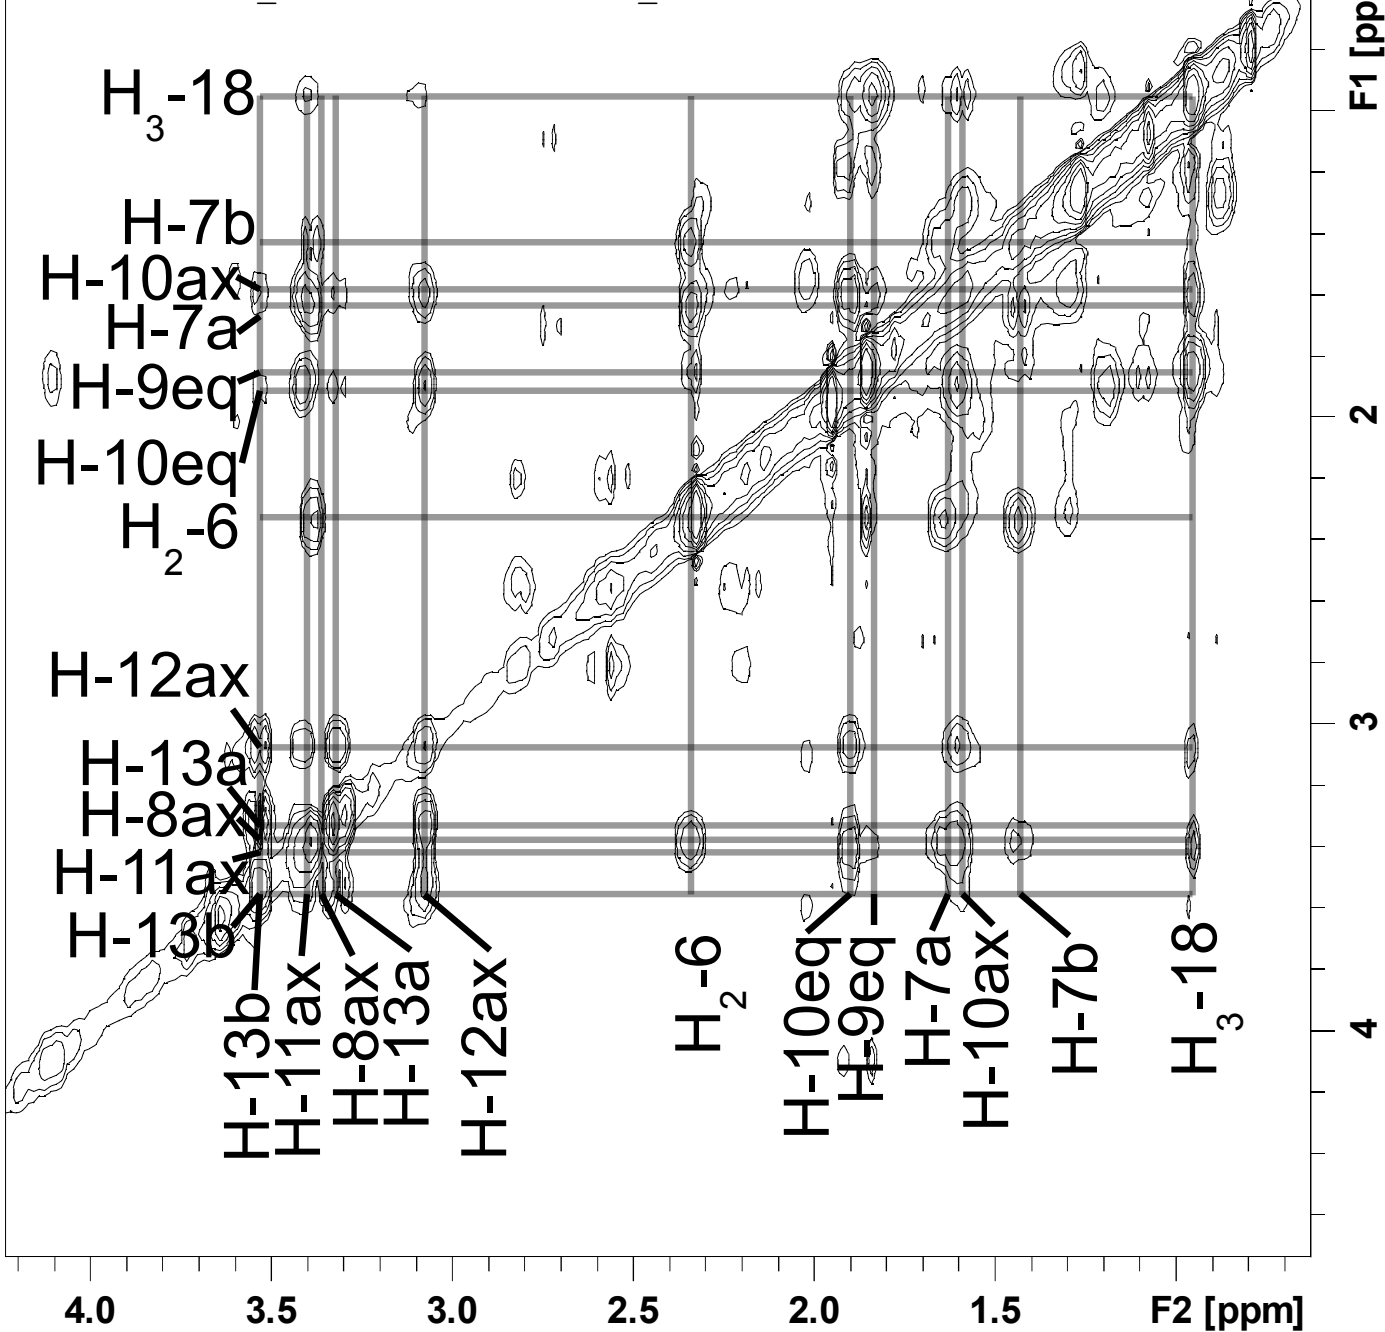

(d)

Figure S4 continued.

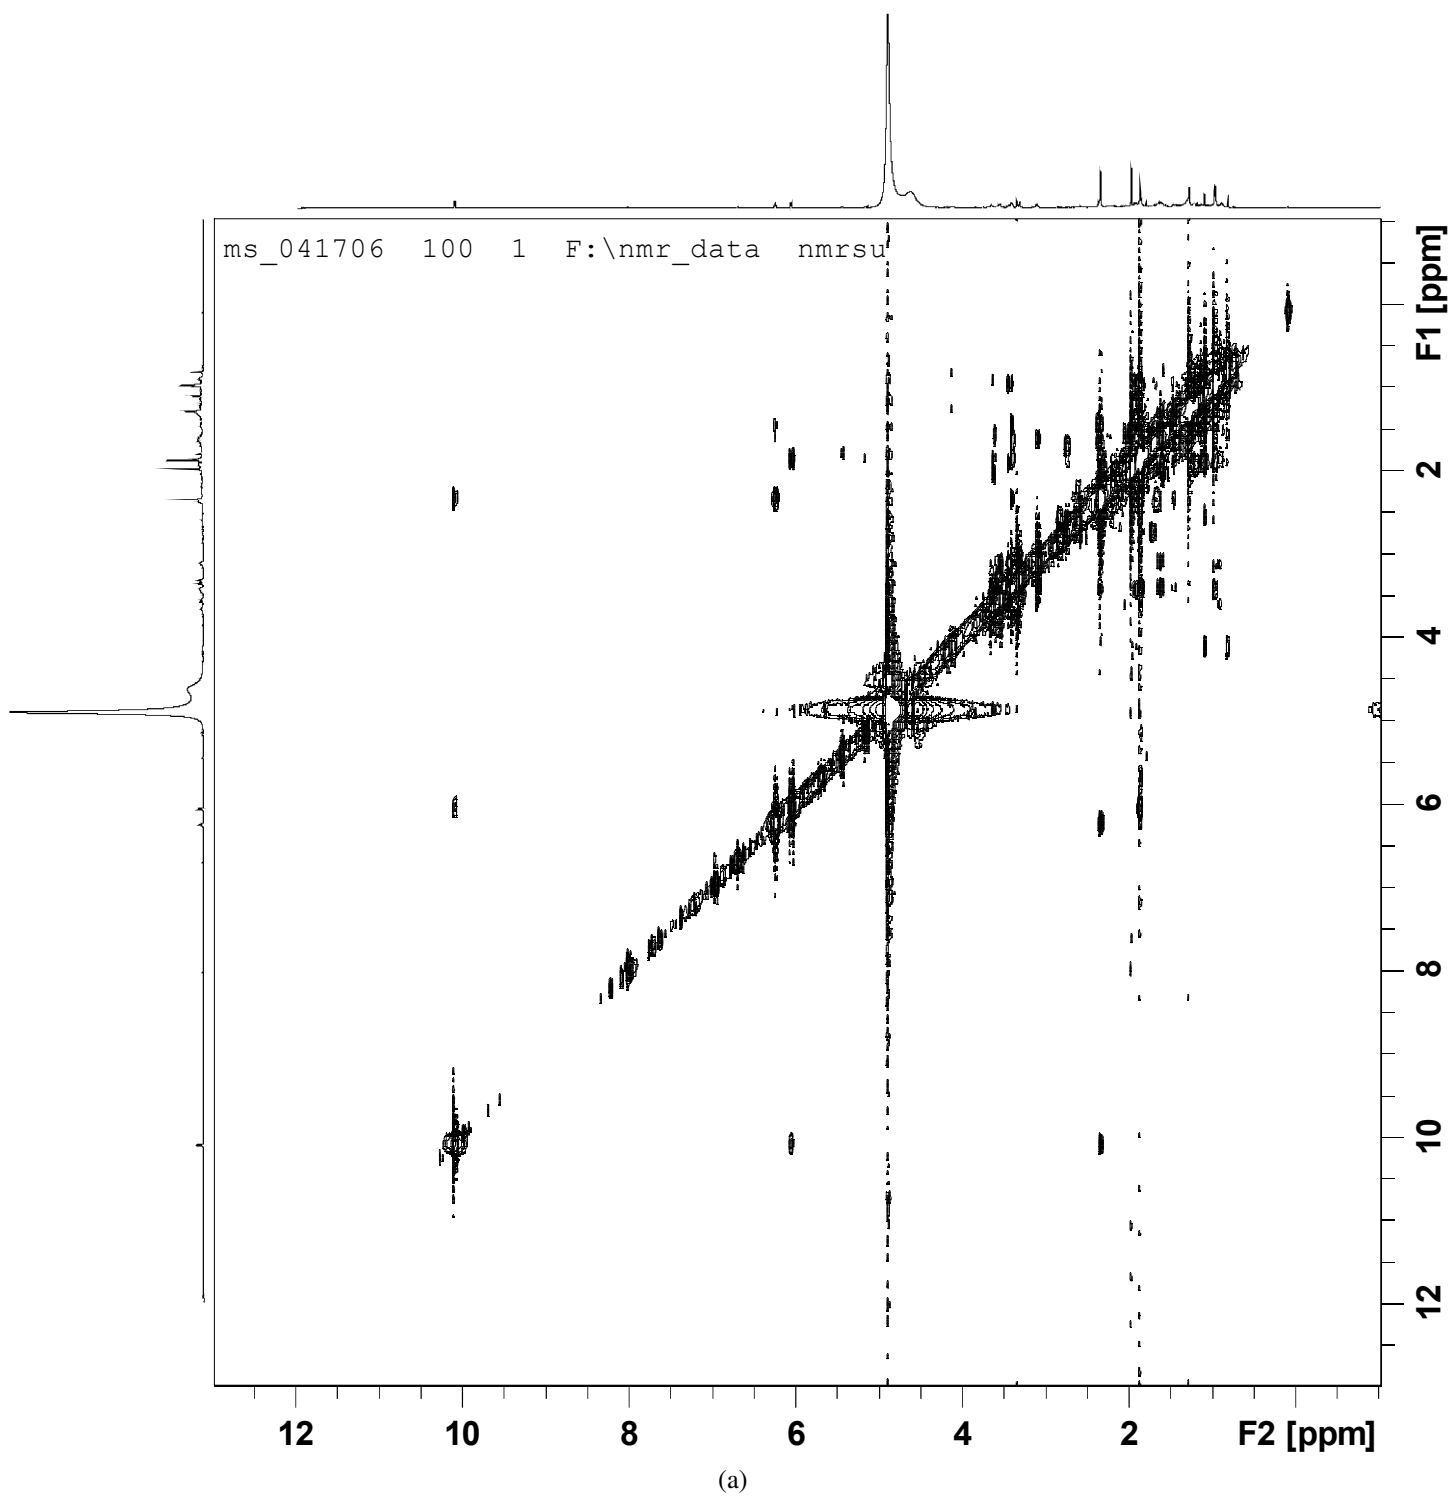

Figure S5. NOESY spectrum of brevisamide (**1**). a- Full spectrum. b-d- Details from various regions.

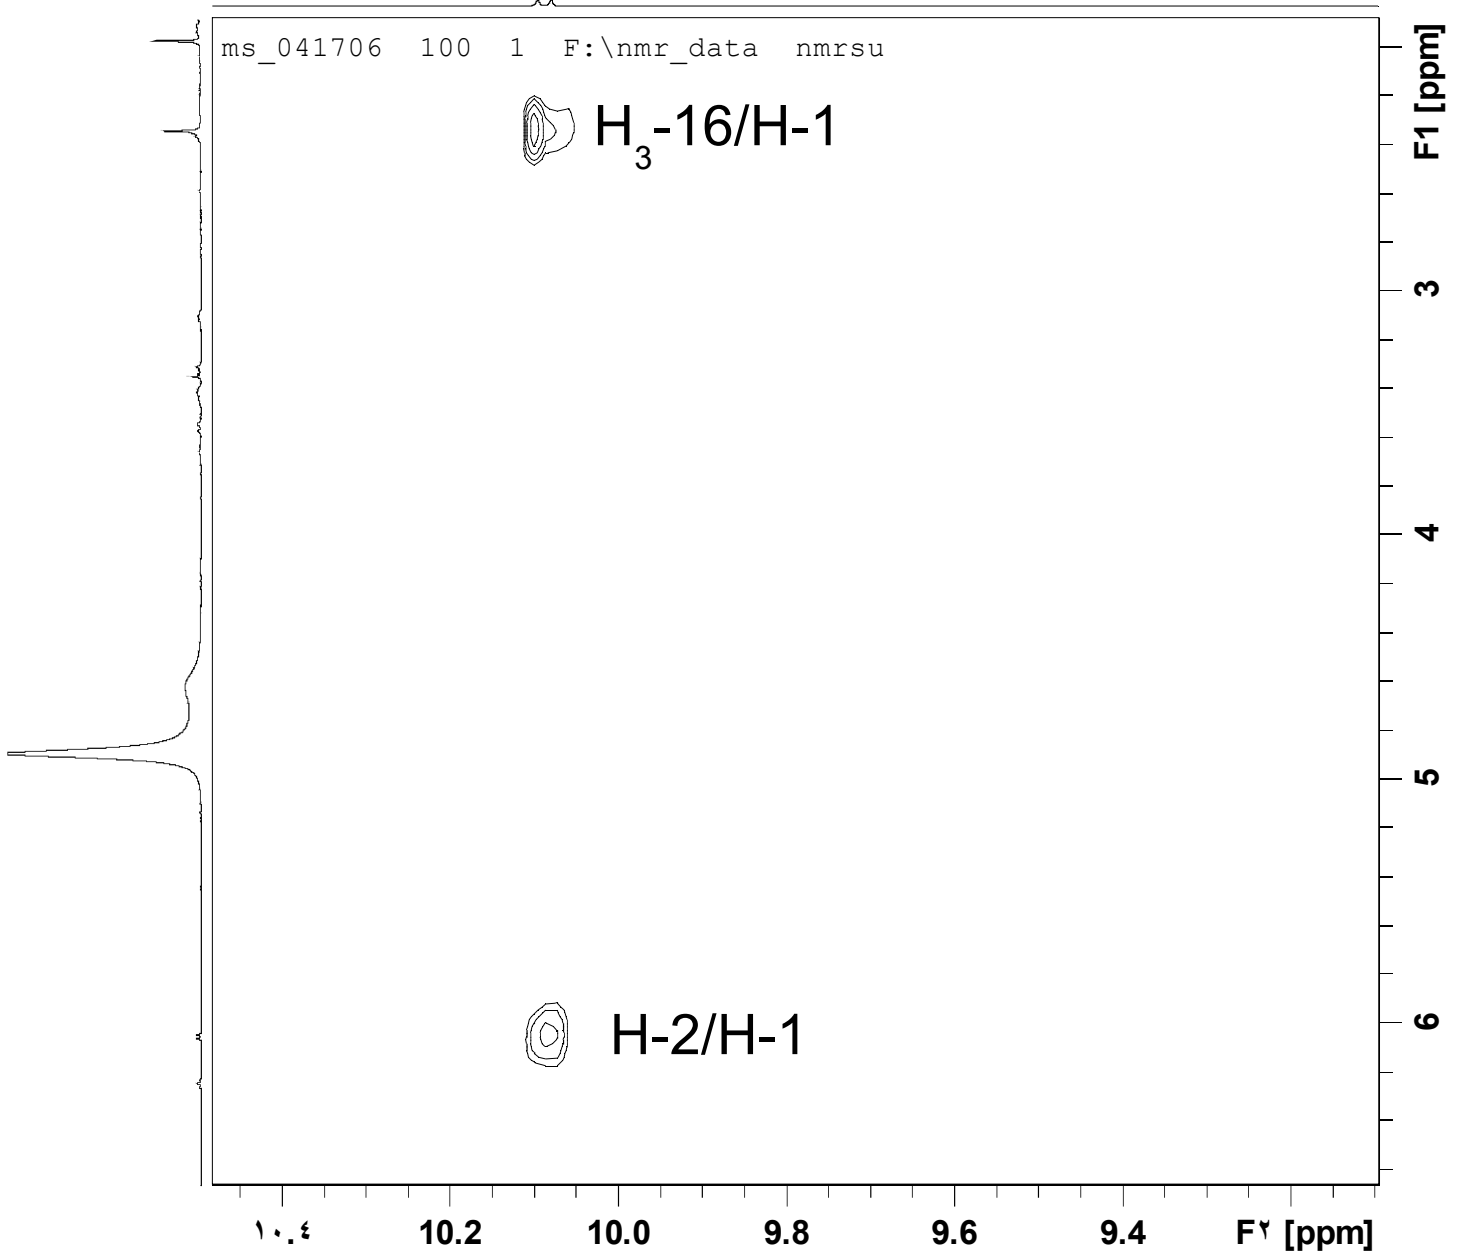

(b)

Figure S5 continued.

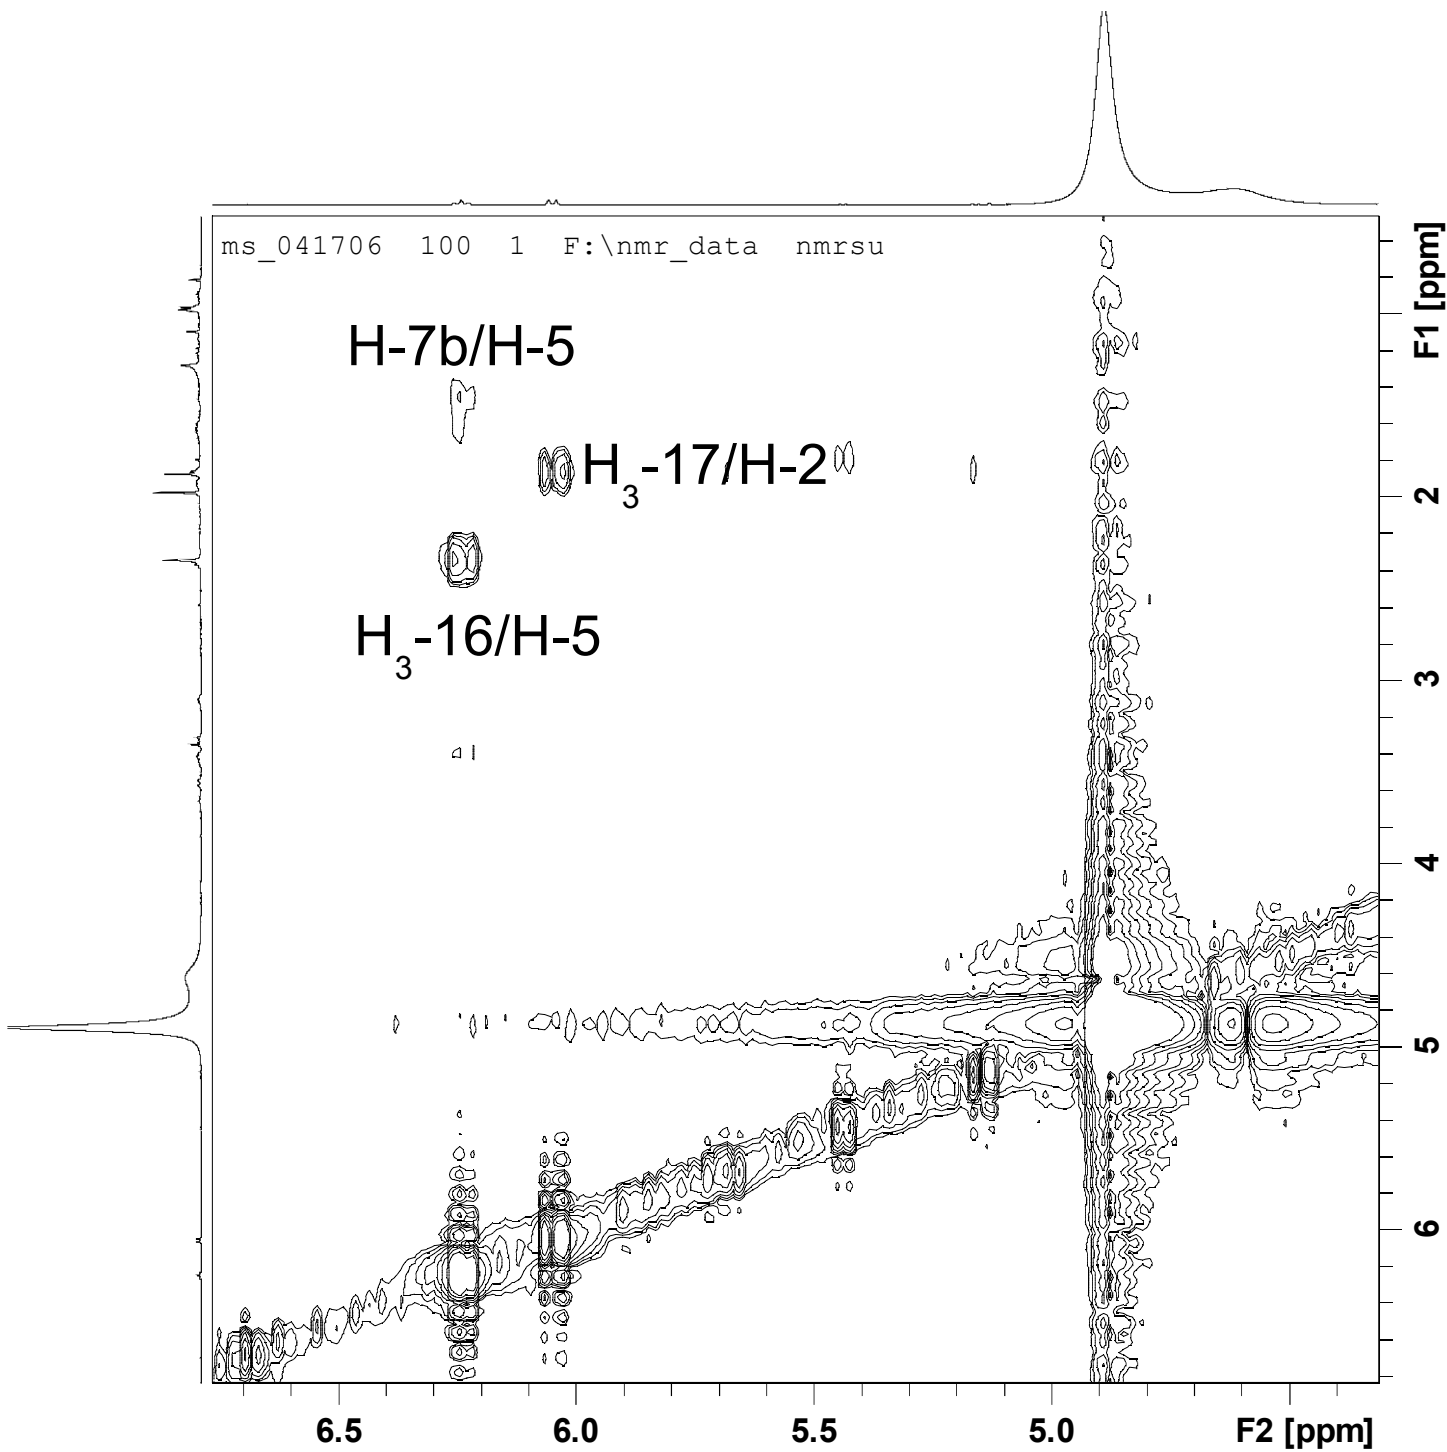

(c)

Figure S5 continued.

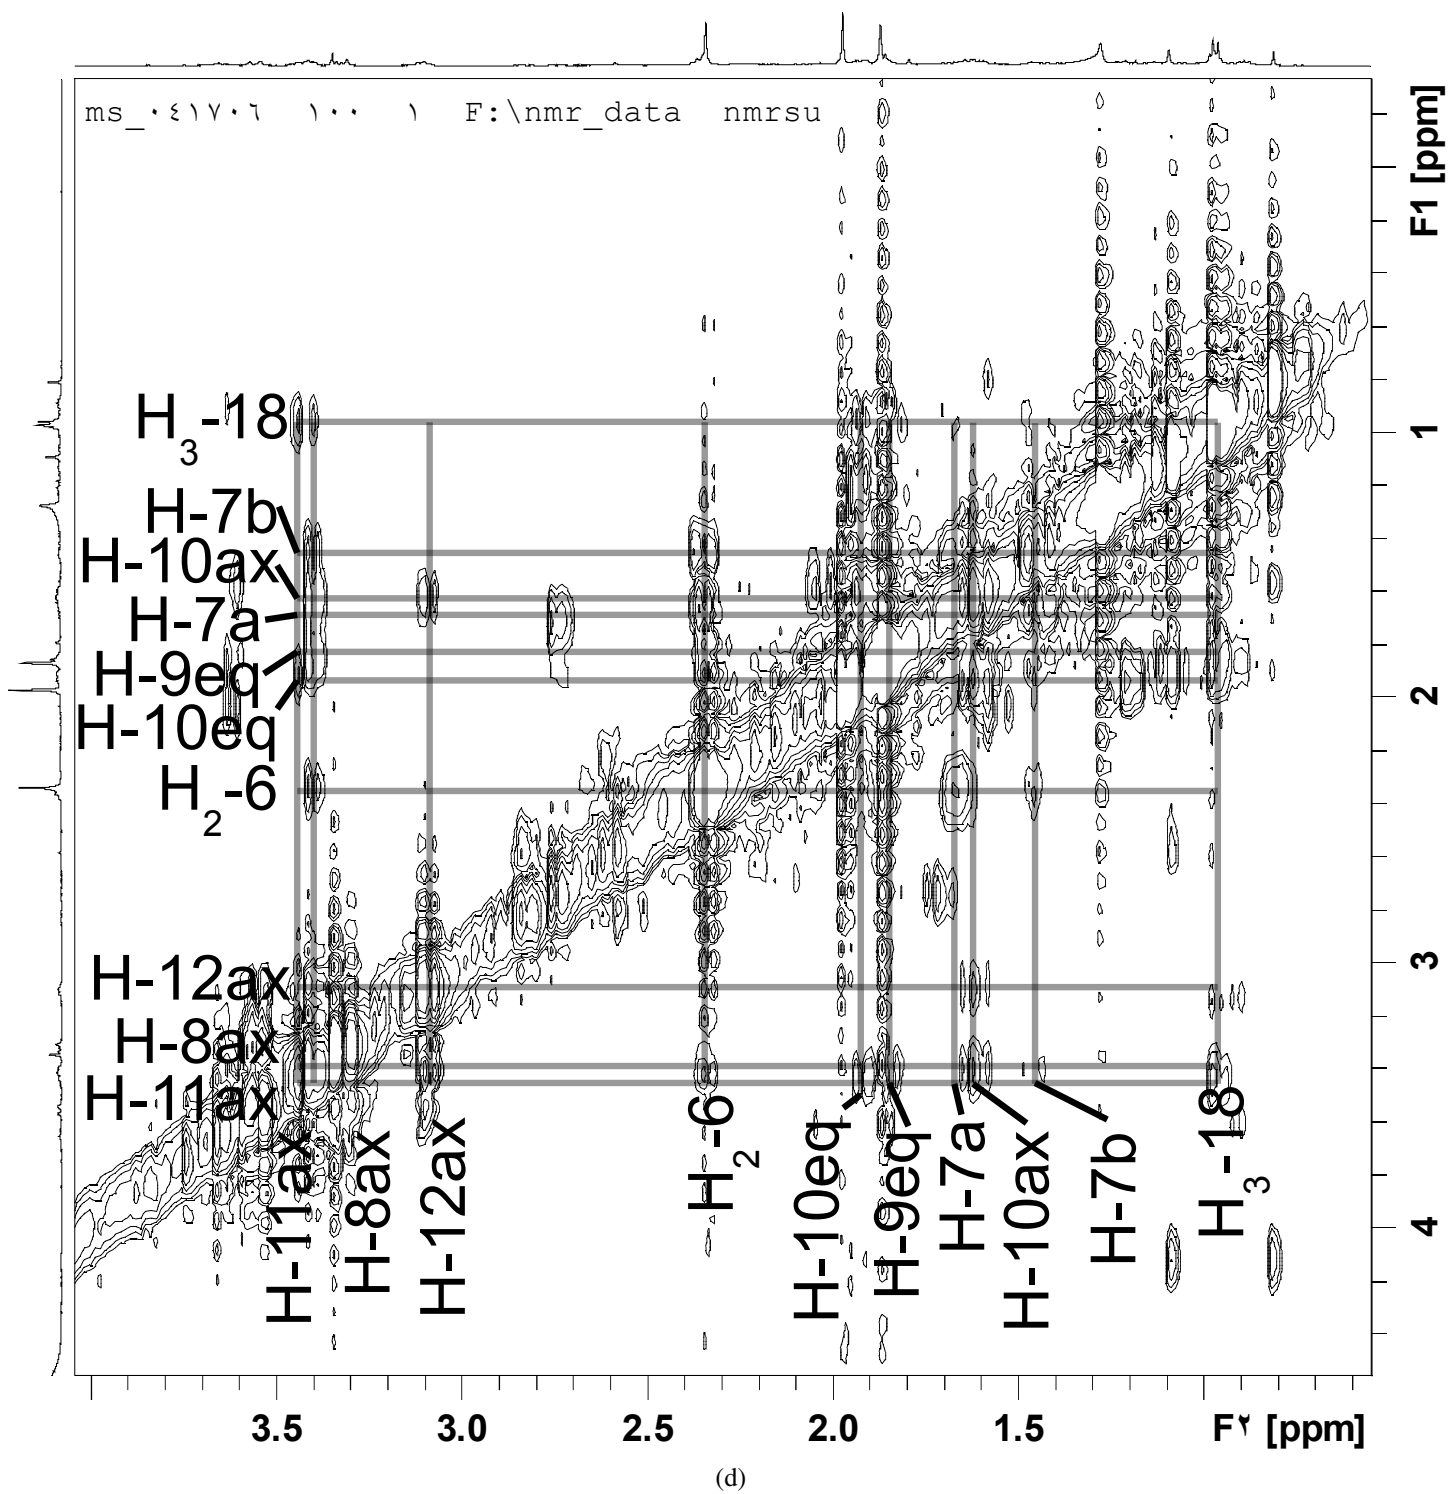

Figure S5 continued.
